# Supplementary material for: A scalable solid-state nanoporous network with atomic-level interaction design for carbon dioxide capture
Source: PubMed Central journal article supplement — Sci Adv. 2022 Aug 3;8(31):eabo6849. doi: 10.1126/sciadv.abo6849 (PMC9348791; doi:10.1126/sciadv.abo6849), 2022-08-03
Supplement: sciadv.abo6849_sm.pdf [file sciadv.abo6849_sm.pdf]

Supplementary Materials for  
**A scalable solid-state nanoporous network with atomic-level interaction  
design for carbon dioxide capture**

Haiyan Mao *et al.*

Corresponding author: Yi Cui, [yicui@stanford.edu](mailto:yicui@stanford.edu); Jeffrey A. Reimer, [reimer@berkeley.edu](mailto:reimer@berkeley.edu)

*Sci. Adv.* **8**, eabo6849 (2022)  
DOI: 10.1126/sciadv.abo6849

**This PDF file includes:**

Table S1  
Figs. S1 to S21

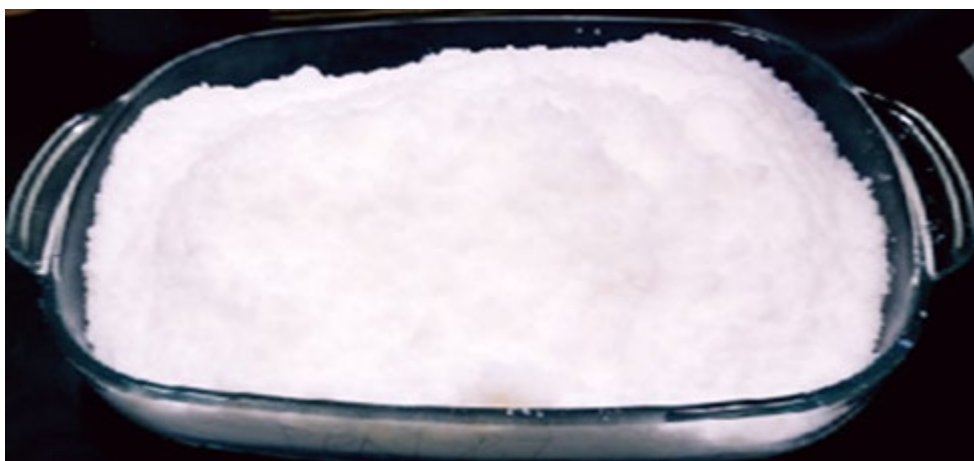

**Fig. S1.** Scalable MNNs<sup>Cya</sup> DETA samples (1 kg) after grinding via mortar and pestle.

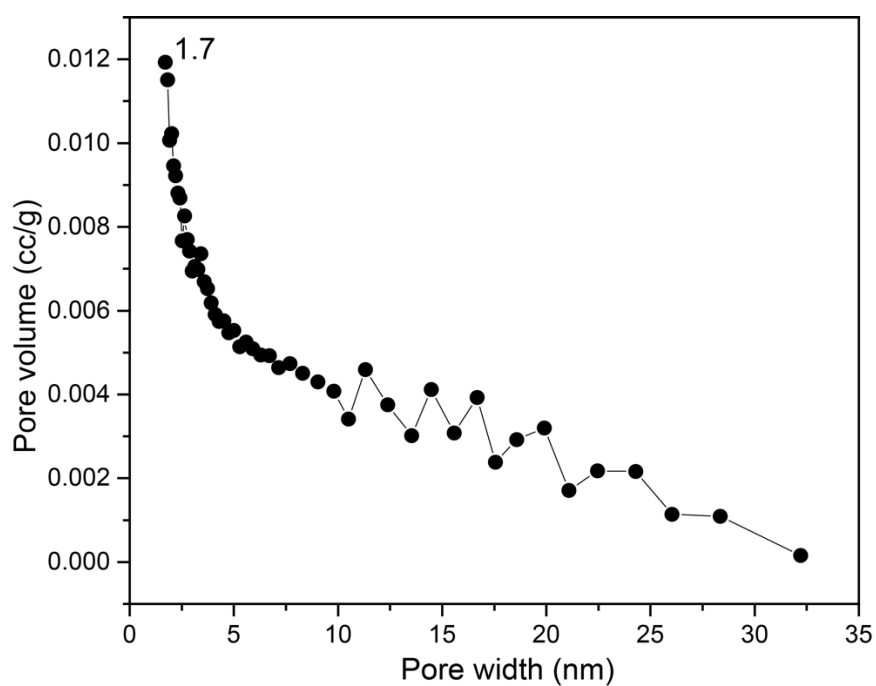

**Fig. S2.** Pore size distribution of MNNs<sup>Cya</sup> DETA.

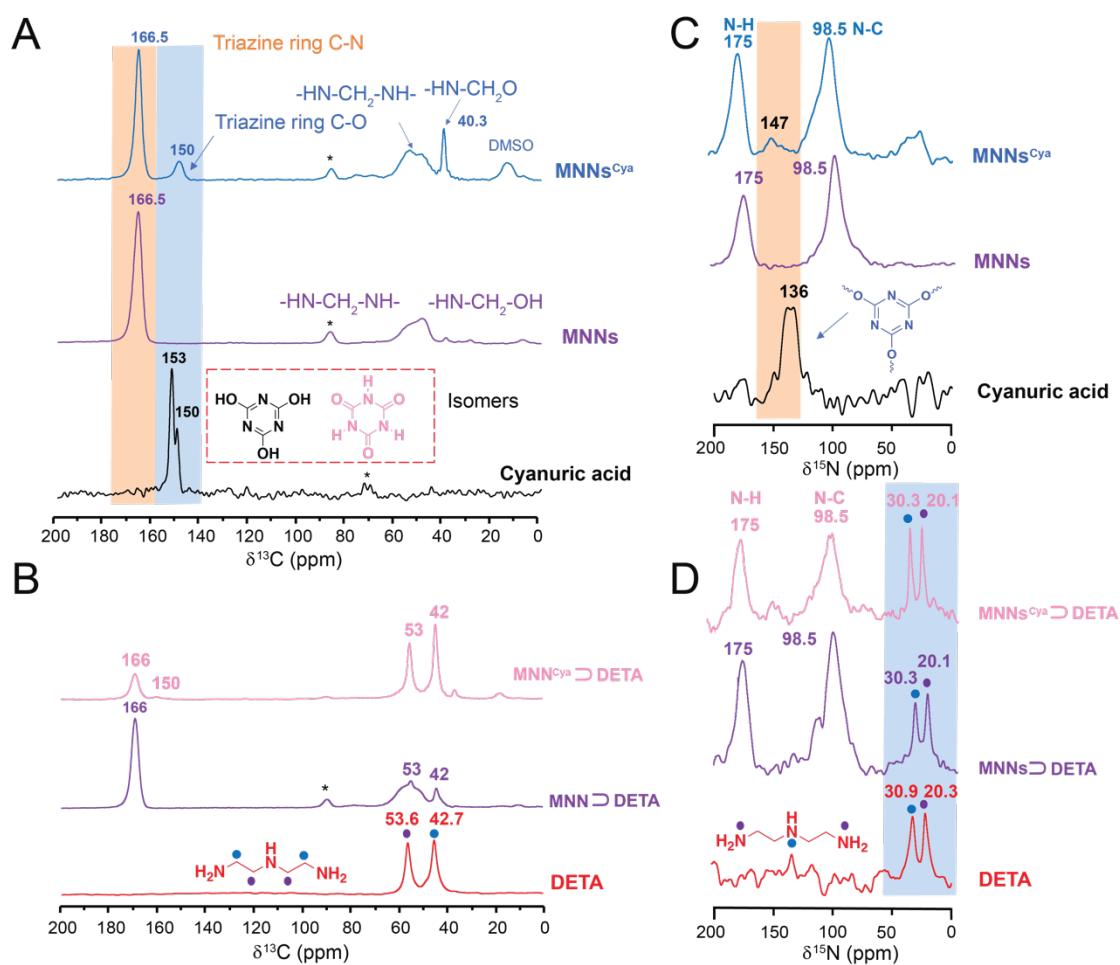

**Fig. S3. Determination of chemical structures of DETA and cyanuric acid-modified MNNs by  $^{13}\text{C}$  and  $^{15}\text{N}$  MAS NMR spectra.** **A**, Direct excitation  $^{13}\text{C}$  MAS NMR spectra of cyanuric acid, MNNs, and  $\text{MNNs}^{\text{Cya}}$ . **B**,  $^{13}\text{C}$  CP-MAS NMR spectra of DETA,  $\text{MNNs} \supset \text{DETA}$ , and  $\text{MNNs}^{\text{Cya}} \supset \text{DETA}$ . **C**,  $^{15}\text{N}$  CP-MAS NMR spectra of cyanuric acid, MNNs, and  $\text{MNNs}^{\text{Cya}}$ . **D**,  $^{15}\text{N}$  CP-MAS NMR spectra of DETA,  $\text{MNNs} \supset \text{DETA}$ ,  $\text{MNNs}^{\text{Cya}} \supset \text{DETA}$ .

## Deconvolution

To identify the structure of  $\text{MNNs}^{\text{Cya}}$  and  $\text{MNNs}^{\text{Cya}} \supset \text{DETA}$ , quantitative  $^{13}\text{C}$  NMR spectral fitting was carried out using the DMfit software. Deconvolutions were calculated using a mixture of Gaussian and Lorentzian lineshapes to describe the different features in the spectra. Fits were repeated up to four times for each series of data in order to estimate errors. Example deconvolutions of  $^{13}\text{C}$  NMR spectra are depicted in **Fig. S4**.

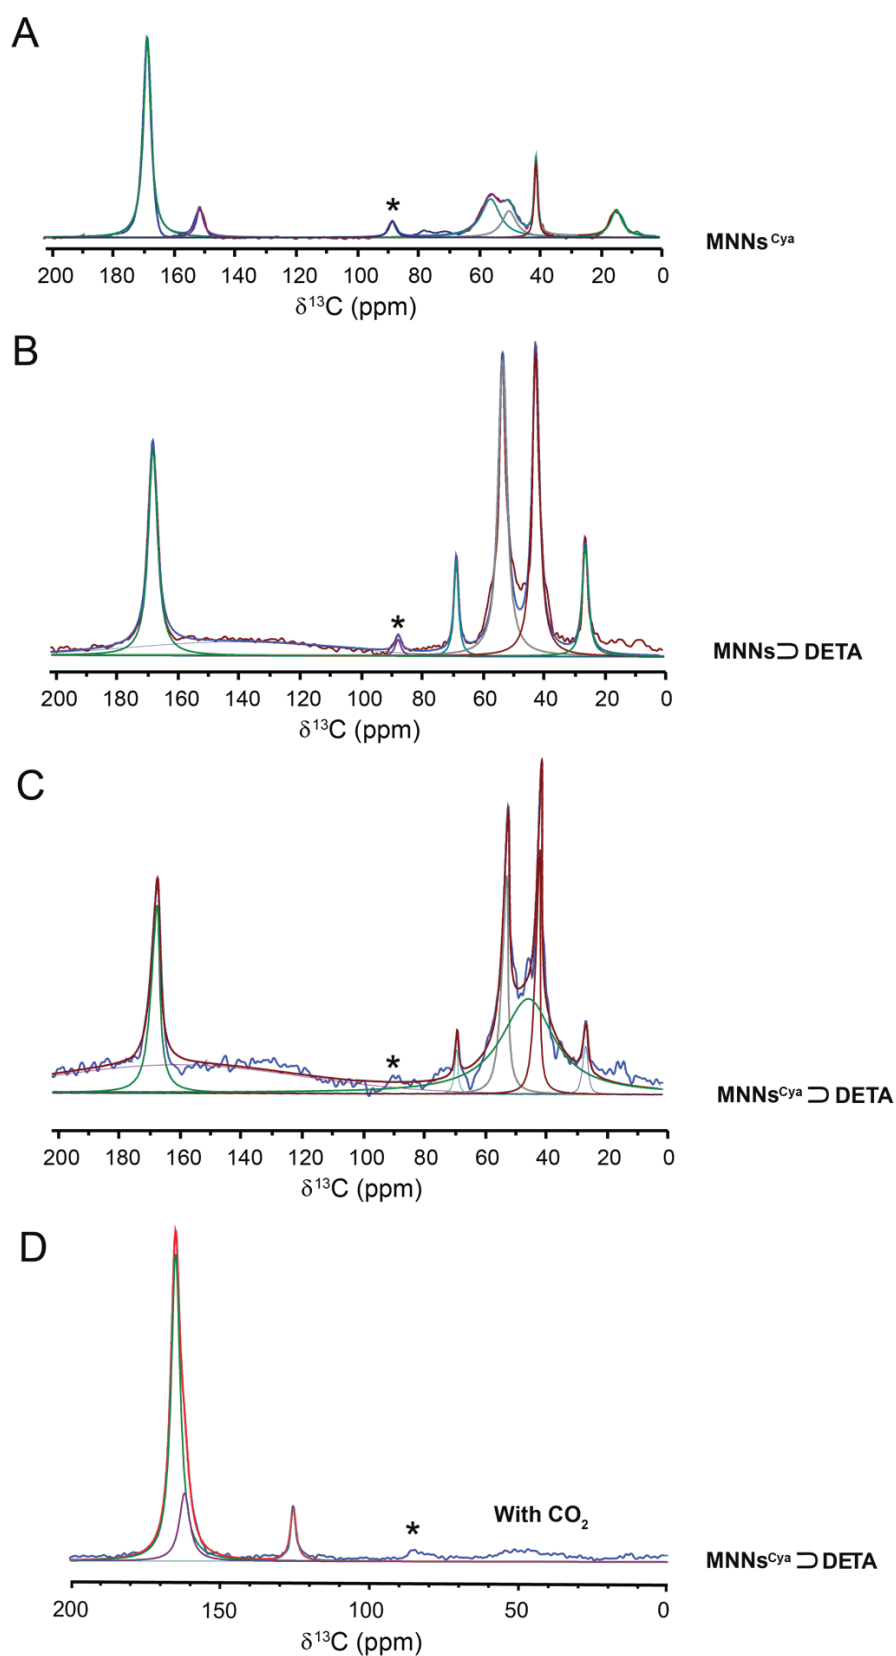

**Fig. S4. Representative deconvolutions of  $^{13}\text{C}$  NMR spectra recorded for MNNs<sup>Cya</sup>  $\supset$  DETA, MNNs<sup>Cya</sup>, and MNNs  $\supset$  DETA.** Experimental lineshapes are shown in blue, while the sum of individually fitted spectra is shown in red. Asterisks denote spinning side bands.

**Table S1. Spectral simulation parameters of Gaussian/Lorentzian of  $\text{MNNs}^{\text{Cya}}$ ,  $\text{MNNs}^{\text{Cya}} \supset \text{DETA}$ ,  $\text{MNNs} \supset \text{DETA}$ , and  $\text{MNNs}^{\text{Cya}} \supset \text{DETA-CO}_2$  using dmfit software.**

| <b><math>^{13}\text{C}</math> NMR spectra</b>       |                                  |                                 |                   |
|-----------------------------------------------------|----------------------------------|---------------------------------|-------------------|
|                                                     | <b><math>\delta</math> (ppm)</b> | <b>Gaussian/<br/>Lorentzian</b> | <b>Proportion</b> |
| $\text{MNNs}^{\text{Cya}}$                          | 166.5                            | 0.95                            | 44.3 %            |
|                                                     | 150.0                            | 0.80                            | 6.8 %             |
|                                                     | 55.0                             | 0.32                            | 15.9%             |
|                                                     | 49.0                             | 0.28                            | 12.1%             |
|                                                     | 40.3                             | 0.90                            | 13.0%             |
|                                                     | 14.1                             | 0.3                             | 7.9%              |
| $\text{MNNs} \supset \text{DETA}$                   | 166.5                            | 0.95                            | 21.3 %            |
|                                                     | 67.8                             | 0.98                            | 13.2 %            |
|                                                     | 53.0                             | 0.92                            | 26.4%             |
|                                                     | 42.0                             | 0.95                            | 24.1%             |
|                                                     | 25.7                             | 0.90                            | 15.0%             |
| $\text{MNNs}^{\text{Cya}} \supset \text{DETA}$      | 166.5                            | 0.98                            | 20.3 %            |
|                                                     | 151.0                            | 0.15                            | 4.0 %             |
|                                                     | 67.5                             | 0.92                            | 16.4%             |
|                                                     | 53.0                             | 0.95                            | 25.1%             |
|                                                     | 42.0                             | 0.90                            | 25.3%             |
|                                                     | 25.7                             | 0.90                            | 8.9%              |
| $\text{MNNs}^{\text{Cya}} \supset \text{DETA-CO}_2$ | 164.7                            | 0.98                            | 73.2%             |
|                                                     | 161.1                            | 0.95                            | 18.7%             |
|                                                     | 125.4                            | 0.95                            | 8.1%              |

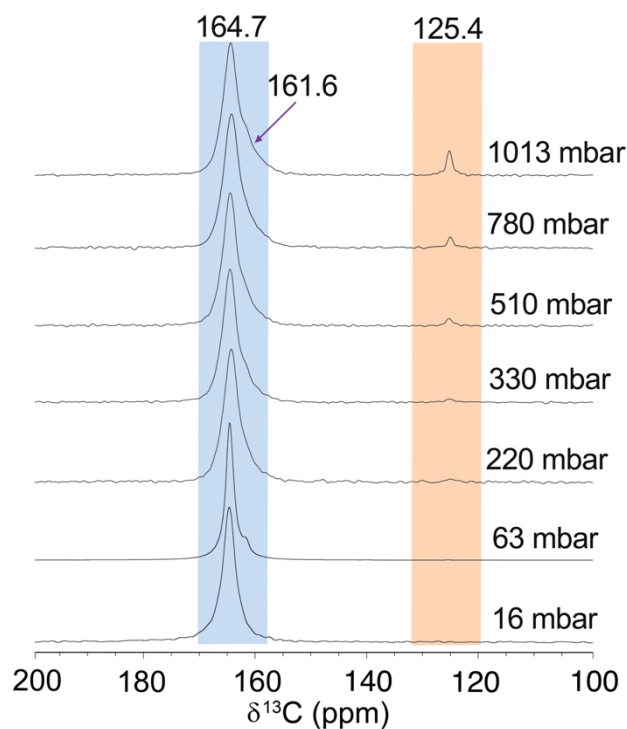

**Fig. S5.**  $^{13}\text{C}$  MAS (15 kHz) NMR (16.4 T) spectrum of  $\text{MNNs}^{\text{Cya}} \supset \text{DETA}$  dosed with  $^{13}\text{CO}_2$  at room temperature (298 K) acquired by direct excitation. Each sample was rapidly dosed with  $^{13}\text{CO}_2$  using the designed setup and allowed to equilibrate for at least 24 hours before measurement.

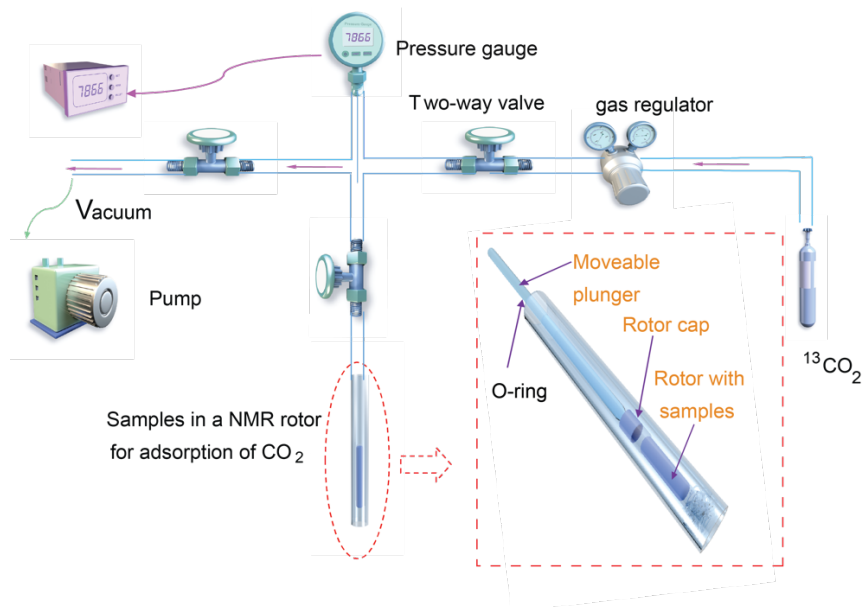

**Fig. S6.** Schematic of home-built setup for gas dosing of NMR samples.  $^{13}\text{CO}_2$  gas was dosed at approximately 1 bar.

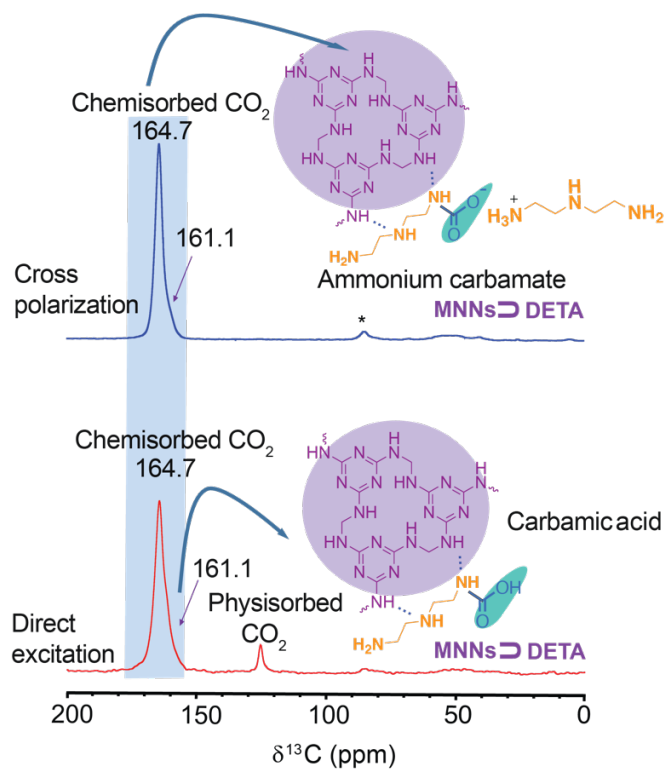

**Fig. S7. Direct excitation  $^{13}\text{C}$  MAS NMR spectra and cross-polarized  $^{13}\text{C}$  MAS NMR spectra (with continuous-wave  $^1\text{H}$  decoupling) of  $\text{CO}_2$  adsorbed  $\text{MNNs}@ \text{DETA}$ .**

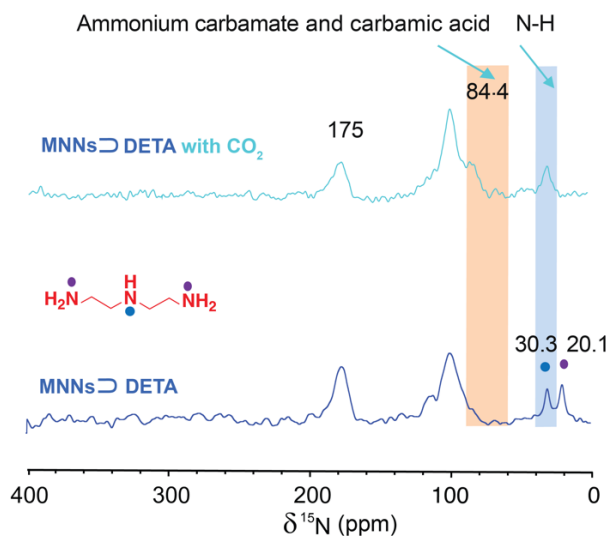

**Fig. S8. Cross-polarized  $^{15}\text{N}$  MAS NMR spectra of  $\text{MNNs}@ \text{DETA}$  with and without  $\text{CO}_2$  adsorption.**

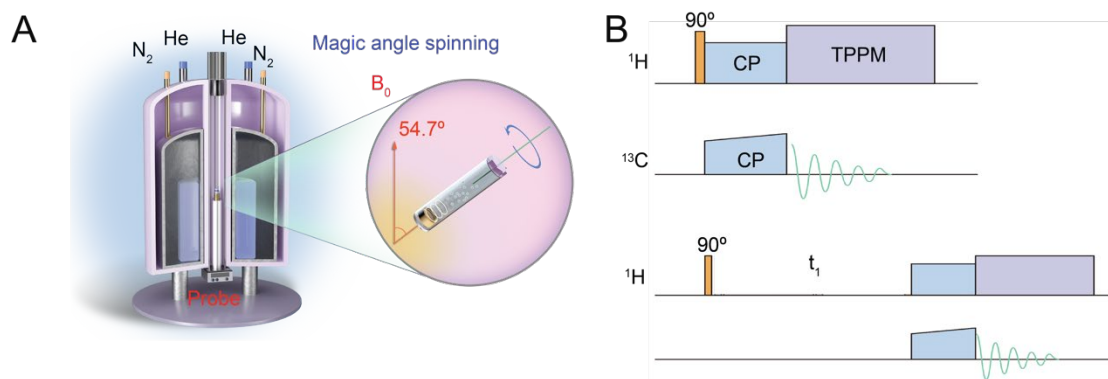

**Fig. S9. Principle of solid-state nuclear magnetic resonance (NMR) spectroscopy.** (A) Schematic diagram of solid-state NMR measurements. (B) Cross-polarization (CP) pulse timing diagram. 2D  $^1\text{H}$ - $^{13}\text{C}$  HETCOR with  $^1\text{H}$  homonuclear decoupling pulse timing diagram. In these pulse sequences, the heteronuclear decoupling scheme can be two-pulse phase modulation (TPPM) in the CP experiment in the HETCOR experiment.  $t_1$  and  $t_2$  refer to time-domain increments for 2D experiments, and  $90^\circ$  pulse is shown as filled narrow rectangles.



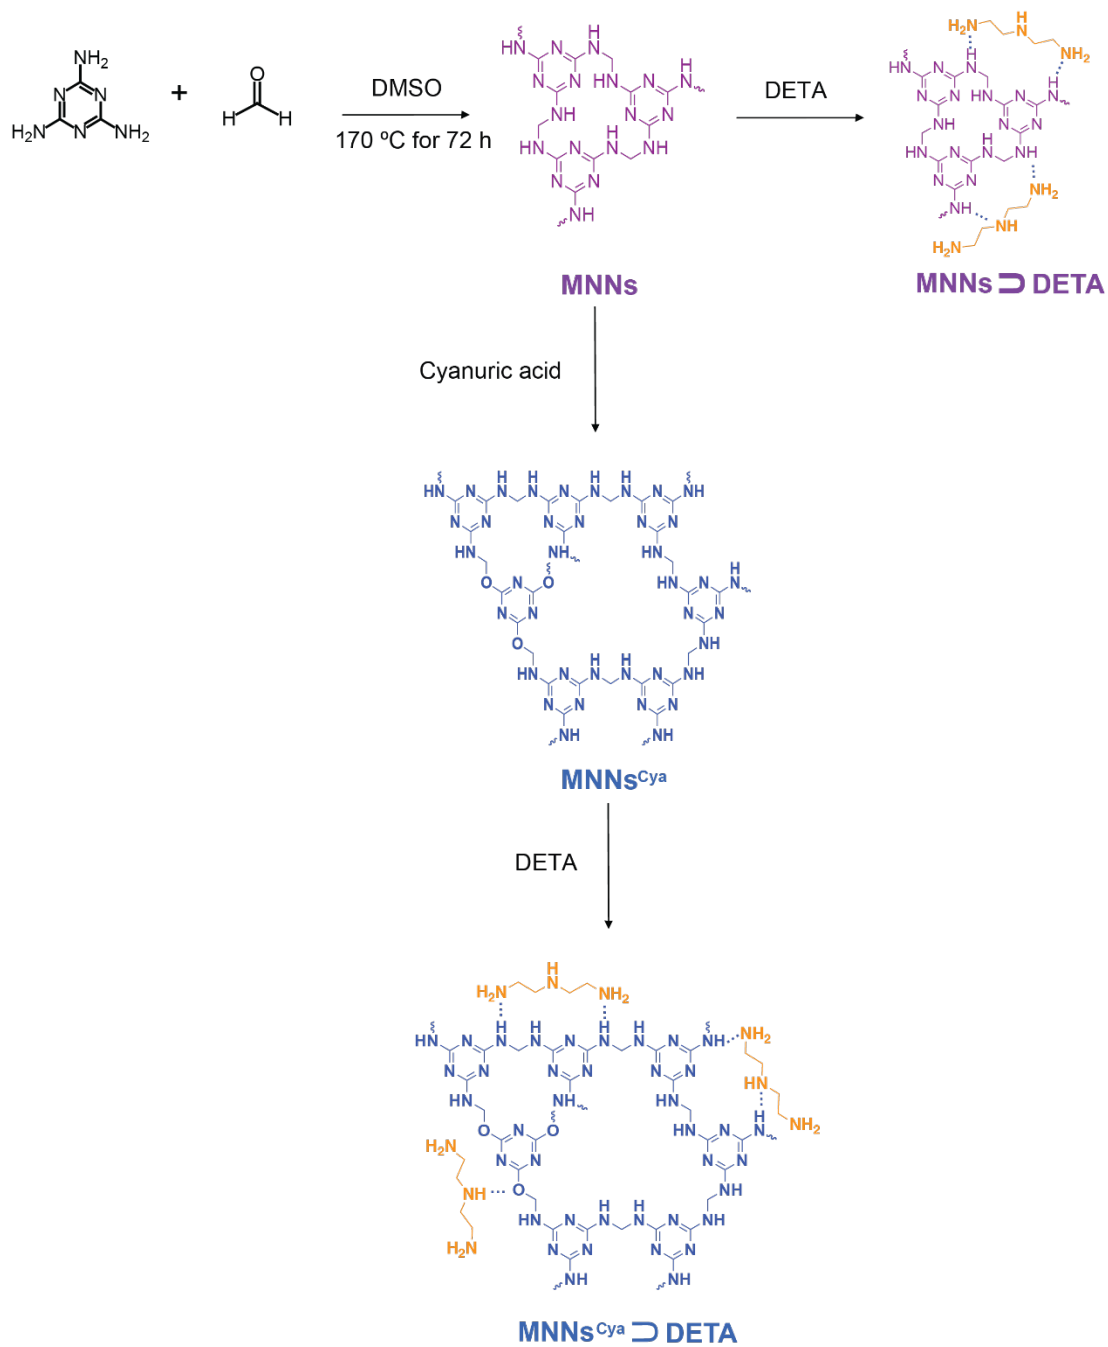

**Fig. S10.** The schematic synthesis of MNNs, MNNs<sup>Cya</sup>, MNNs ⊃ DETA, and MNNs<sup>Cya</sup> ⊃ DETA.

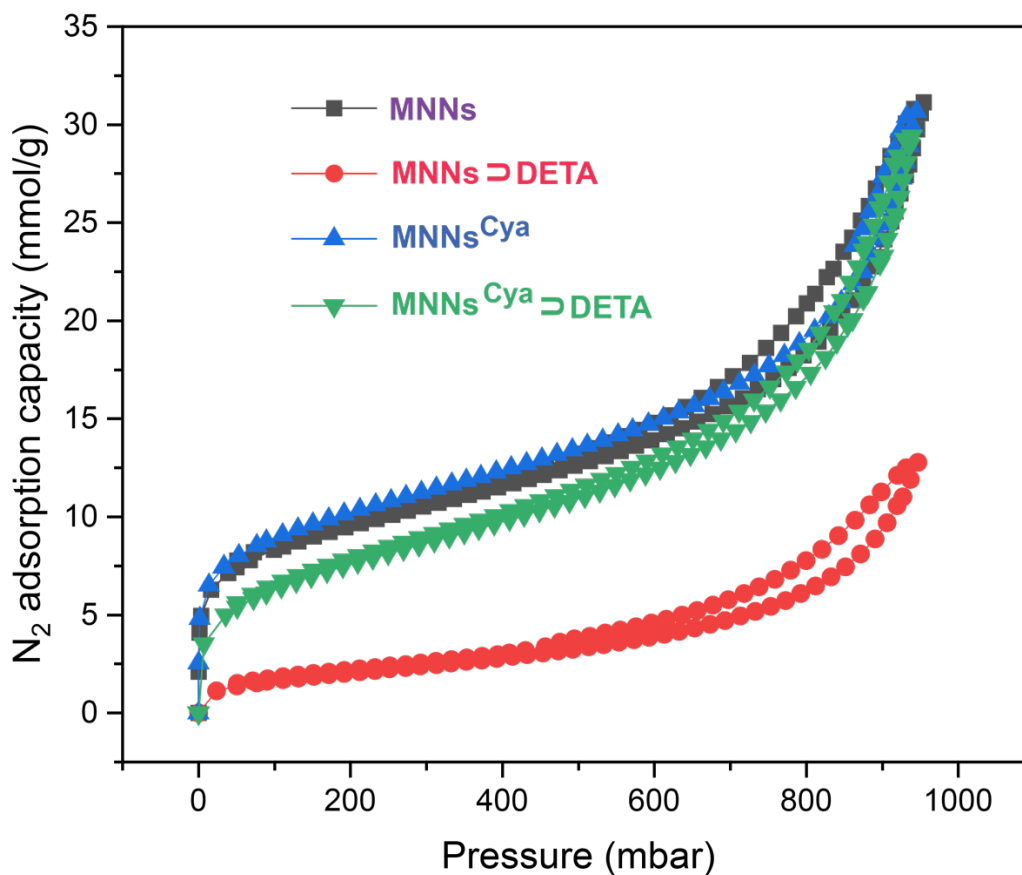

**Fig. S11.** N<sub>2</sub> adsorption and desorption isotherms for MNNs, MNNs ⊃ DETA, MNNs<sup>Cya</sup>, and MNNs<sup>Cya</sup> ⊃ DETA at 77 K.

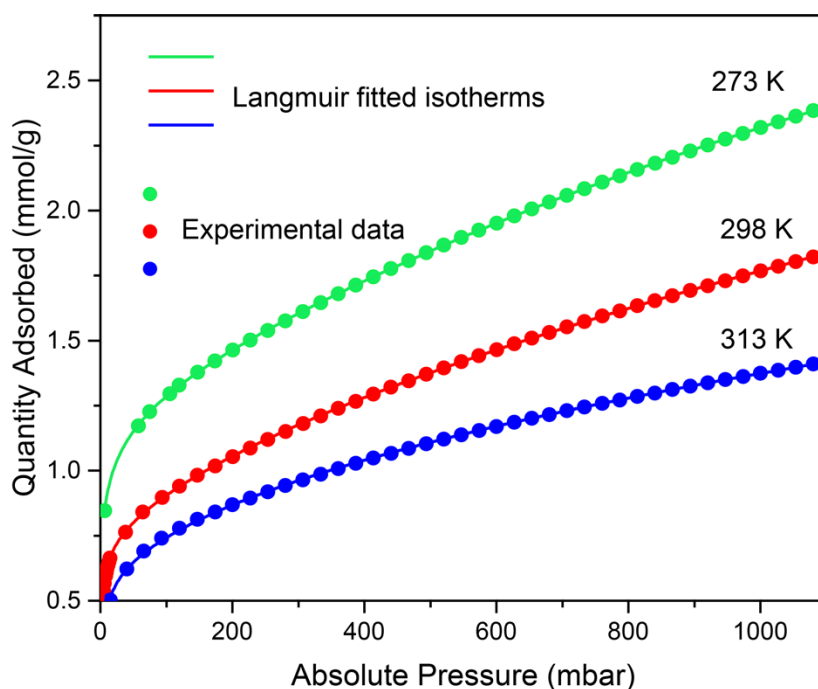

**Fig. S12.** Experimental data (symbols) and Langmuir modeling fit (solid curves) at 273 K (green), 298 K (red), and 313 K (blue) for CO<sub>2</sub> adsorption in MNNs<sup>Cya</sup> ⊃ DETA.

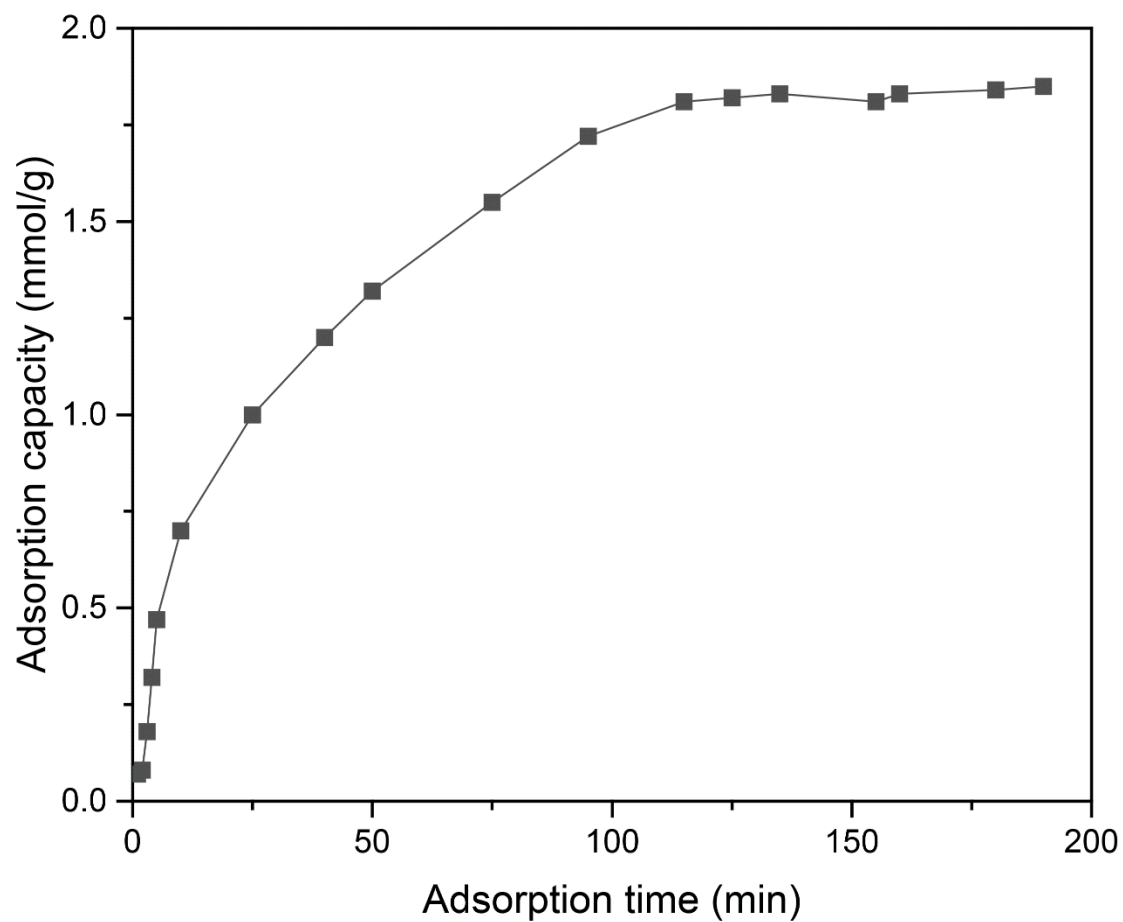

**Fig. S13.** Breakthrough adsorption experiments performed at 298 K with the feed containing CO<sub>2</sub> at the partial pressure of 1 bar and flow rate 0.1 L/min. The rate of CO<sub>2</sub> extraction is calculated as moles of CO<sub>2</sub> captured per gram adsorbent per unit time.

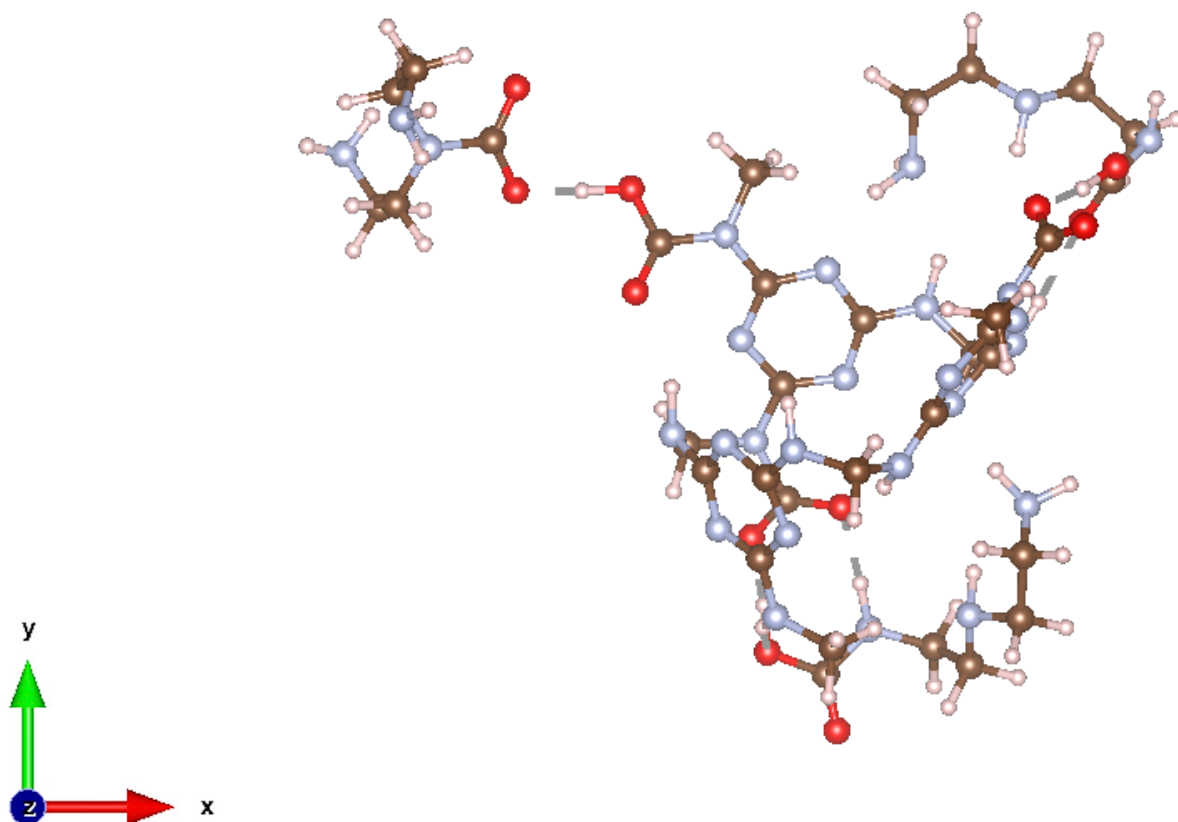

**Fig. S14. Proposed DFT-calculated structure of CO<sub>2</sub>-reacted mixed ammonium carbamate and carbamic acid within MNNDETA (Structure 1). The structure was obtained by DFT calculation at the TPSS-D3(BJ)/6-31G\* level.**

Coordinates:

|   | X         | Y         | Z         |
|---|-----------|-----------|-----------|
| C | -1.303352 | -4.577277 | 0.813264  |
| N | -2.204985 | -3.932952 | 0.042298  |
| C | -2.486375 | -2.676647 | 0.441392  |
| N | -2.075507 | -2.092064 | 1.600384  |
| C | -1.174664 | -2.840866 | 2.260456  |
| N | -0.712272 | -4.065482 | 1.927296  |
| N | -0.588091 | -2.252959 | 3.382043  |
| N | -3.191880 | -1.900041 | -0.445678 |
| N | -0.967050 | -5.836894 | 0.424325  |
| C | 0.777624  | -2.695727 | 3.698832  |
| N | 1.702886  | -2.579536 | 2.577064  |
| C | 2.445675  | -1.441606 | 2.350070  |
| N | 2.818561  | -1.243084 | 1.064684  |
| C | 3.677228  | -0.207468 | 0.915344  |
| N | 4.178870  | 0.562899  | 1.891947  |

|   |           |           |           |
|---|-----------|-----------|-----------|
| C | 3.659855  | 0.319951  | 3.113458  |
| N | 2.769833  | -0.673315 | 3.409564  |
| N | 4.094408  | 1.081017  | 4.170340  |
| N | 4.149759  | 0.061760  | -0.353559 |
| C | 3.314759  | -0.177330 | -1.528602 |
| N | 2.267578  | 0.837130  | -1.675220 |
| C | 0.926956  | 0.566483  | -1.617467 |
| N | 0.520290  | -0.684740 | -1.906473 |
| C | -0.819758 | -0.842982 | -1.846438 |
| N | -1.715186 | 0.142146  | -1.564687 |
| C | -1.186981 | 1.335558  | -1.288869 |
| N | 0.132531  | 1.633112  | -1.300560 |
| N | -1.420726 | -2.053611 | -2.123938 |
| C | -2.884658 | -2.130505 | -1.861092 |
| N | -2.048771 | 2.393826  | -0.996919 |
| C | 0.254246  | -6.489507 | 0.891914  |
| C | 3.796383  | 0.626848  | 5.525380  |
| C | -1.459000 | 3.734361  | -0.888348 |
| H | -0.702577 | -1.239220 | 3.345274  |
| H | -3.211913 | -0.899841 | -0.211655 |
| H | -1.249565 | -6.067873 | -0.535040 |
| H | 0.721274  | -3.747267 | 3.990573  |
| H | 1.167620  | -2.082758 | 4.514184  |
| H | 1.366719  | -3.033883 | 1.725755  |
| H | 2.820045  | -1.149941 | -1.467409 |
| H | 3.978050  | -0.154678 | -2.403166 |
| H | -3.410440 | -1.361086 | -2.428871 |
| H | -3.173403 | -3.134691 | -2.164618 |
| H | 0.348627  | -6.331861 | 1.971354  |
| H | 0.168398  | -7.562551 | 0.677783  |
| H | 1.149592  | -6.098086 | 0.380692  |
| H | 4.442661  | 1.215079  | 6.182820  |
| H | 2.736473  | 0.784879  | 5.777868  |
| H | 4.007892  | -0.445273 | 5.631843  |
| H | -0.672102 | 3.731375  | -0.124021 |
| H | -1.012391 | 4.045188  | -1.843586 |
| H | -2.257715 | 4.423556  | -0.617242 |
| N | 4.444147  | 5.249481  | -1.571492 |
| C | 3.234304  | 5.960500  | -1.961073 |
| C | 2.012417  | 5.241276  | -1.373774 |
| H | 3.109465  | 6.019393  | -3.070167 |
| H | 3.276896  | 7.001300  | -1.596108 |
| C | 5.611991  | 5.550559  | -2.381076 |
| H | 4.240938  | 4.242130  | -1.593243 |

|   |            |           |           |
|---|------------|-----------|-----------|
| C | 6.761505   | 4.571001  | -2.070895 |
| H | 5.933158   | 6.586942  | -2.163362 |
| H | 5.415796   | 5.516271  | -3.480874 |
| N | 1.963775   | 3.871105  | -1.902770 |
| H | 2.129360   | 5.170030  | -0.284676 |
| H | 1.103252   | 5.840181  | -1.579358 |
| H | 2.529961   | 1.806199  | -1.473085 |
| N | 7.079935   | 4.438284  | -0.653893 |
| H | 6.482103   | 3.564513  | -2.404232 |
| H | 7.662902   | 4.881761  | -2.623564 |
| H | 4.691367   | 0.937332  | -0.355322 |
| H | 1.751388   | 3.900230  | -2.906432 |
| H | 1.193236   | 3.320606  | -1.483592 |
| H | -7.678988  | 6.251026  | 2.055188  |
| C | -8.740038  | 5.967495  | 2.125264  |
| H | -8.970308  | 6.284700  | 0.003878  |
| H | -11.057311 | 4.299180  | -1.440326 |
| C | -9.156488  | 5.476263  | 0.729449  |
| N | -10.262514 | 4.131982  | -2.072223 |
| H | -9.668060  | 4.959828  | -1.945530 |
| N | -8.428626  | 4.263674  | 0.357148  |
| H | -10.088080 | 3.019041  | 0.567459  |
| H | -10.231490 | 5.241360  | 0.737751  |
| C | -9.159295  | 3.055184  | -0.027508 |
| C | -9.494442  | 2.982459  | -1.532688 |
| H | -8.547537  | 2.924065  | -2.081096 |
| H | -10.064636 | 2.061698  | -1.740319 |
| H | -8.541598  | 2.188077  | 0.237713  |
| H | -8.590308  | 4.056728  | 2.687462  |
| N | -9.018288  | 4.893743  | 3.110166  |
| H | -8.448882  | 5.073060  | 3.945672  |
| H | -9.330361  | 6.860593  | 2.394066  |
| H | 2.929830   | -5.624832 | -3.643316 |
| C | 2.427967   | -6.479486 | -3.163845 |
| H | 4.247583   | -7.149319 | -2.217774 |
| H | 5.368027   | -2.984679 | -0.208209 |
| C | 3.211684   | -6.877390 | -1.899969 |
| H | 3.292377   | -4.887462 | -1.361428 |
| N | 4.446737   | -3.426469 | -0.225380 |
| H | 3.776340   | -2.689757 | 0.036025  |
| N | 3.204894   | -5.808025 | -0.906716 |
| H | 5.281931   | -6.072301 | -0.437706 |
| H | 2.754278   | -7.781981 | -1.472784 |
| C | 4.299228   | -5.866544 | 0.052423  |

|   |           |           |           |
|---|-----------|-----------|-----------|
| C | 4.367224  | -4.510065 | 0.776303  |
| H | 3.451044  | -4.380538 | 1.366031  |
| H | 5.215065  | -4.507444 | 1.483283  |
| H | 4.124795  | -6.681622 | 0.775687  |
| N | 1.046557  | -6.096680 | -2.944228 |
| H | 2.444912  | -7.329370 | -3.860171 |
| C | -0.741282 | -3.314518 | -2.446831 |
| O | 0.448146  | -3.474723 | -2.092088 |
| O | -1.495910 | -4.130720 | -3.080817 |
| C | -7.069736 | 4.426480  | -0.101493 |
| O | -6.570299 | 3.344121  | -0.590467 |
| O | -6.553003 | 5.559759  | 0.032039  |
| C | 4.914811  | 2.319201  | 4.018033  |
| O | 4.661571  | 2.971807  | 2.955017  |
| O | 5.679404  | 2.578964  | 4.967005  |
| H | 5.642105  | 3.386021  | 2.048207  |
| C | 6.261795  | 3.573121  | 0.108676  |
| H | 7.227649  | 5.318405  | -0.161631 |
| O | 5.626755  | 2.660505  | -0.443742 |
| O | 6.360279  | 3.868255  | 1.389348  |
| H | -1.230747 | -5.585020 | -2.736768 |
| C | 0.106868  | -7.068728 | -2.718511 |
| H | 0.849393  | -5.114983 | -2.646415 |
| O | -1.145022 | -6.598368 | -2.468014 |
| O | 0.348190  | -8.285032 | -2.752589 |
| C | -3.465323 | 2.227278  | -0.810336 |
| O | -3.989449 | 1.166918  | -0.481732 |
| O | -4.086528 | 3.381213  | -1.031382 |
| H | -5.140653 | 3.335866  | -0.814913 |

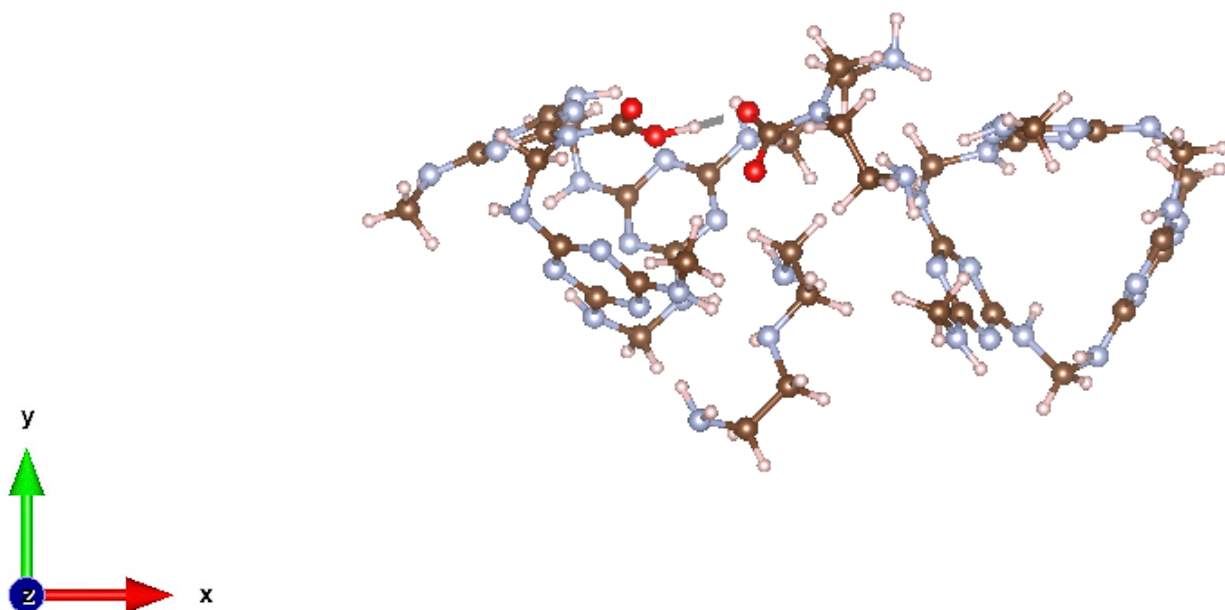

**Fig. S15. DFT-calculated structure of CO<sub>2</sub>-reacted mixed ammonium carbamate and carbamic acid within MNMs ⊃ DETA (Structure 2).** The structure was obtained by DFT calculation at the TPSS-D3(BJ)/6-31G\* level.

Coordinates:

|   | X         | Y         | Z         |
|---|-----------|-----------|-----------|
| C | -8.742418 | 1.447104  | -1.388897 |
| N | -8.104279 | 1.833487  | -2.516899 |
| C | -6.909608 | 2.416365  | -2.259270 |
| N | -6.299334 | 2.540111  | -1.066122 |
| C | -6.992451 | 1.999640  | -0.042943 |
| N | -8.269896 | 1.524948  | -0.136607 |
| N | -6.425167 | 1.909402  | 1.205173  |
| N | -6.216055 | 2.900066  | -3.355654 |
| N | -9.997207 | 0.910366  | -1.562581 |
| C | -7.233982 | 1.303041  | 2.304058  |
| N | -7.664761 | -0.060759 | 1.989410  |
| C | -6.633885 | -0.922766 | 1.606978  |
| N | -6.783008 | -1.516778 | 0.403388  |
| C | -5.697939 | -2.248016 | 0.041971  |
| N | -4.602510 | -2.493173 | 0.775693  |
| C | -4.620188 | -1.870418 | 1.996088  |
| N | -5.595891 | -1.042789 | 2.445316  |
| N | -3.578777 | -2.115973 | 2.820075  |
| N | -5.763055 | -2.765042 | -1.240327 |
| C | -4.571158 | -3.261897 | -1.904994 |
| N | -3.489642 | -2.302158 | -2.116447 |



|   |            |           |           |
|---|------------|-----------|-----------|
| C | -3.667479  | -1.112168 | -2.744840 |
| N | -4.853149  | -0.863490 | -3.356741 |
| C | -4.908311  | 0.361122  | -3.930210 |
| N | -3.929052  | 1.286054  | -3.973901 |
| C | -2.806935  | 0.914885  | -3.307707 |
| N | -2.611711  | -0.256103 | -2.683346 |
| N | -6.109079  | 0.725232  | -4.510799 |
| C | -6.392446  | 2.167390  | -4.612709 |
| N | -1.794091  | 1.830336  | -3.281609 |
| C | -10.566479 | 0.021959  | -0.550695 |
| C | -3.387529  | -1.342949 | 4.048548  |
| C | -0.742932  | 1.752391  | -2.265720 |
| H | -5.227784  | 3.020050  | -3.125389 |
| H | -10.175933 | 0.676268  | -2.535873 |
| H | -8.134351  | 1.902360  | 2.467489  |
| H | -6.590275  | 1.316368  | 3.181968  |
| H | -8.319522  | 0.006203  | 1.204927  |
| H | -4.897812  | -3.656209 | -2.873817 |
| H | -4.147723  | -4.067839 | -1.300499 |
| H | -6.888252  | 0.184386  | -4.136636 |
| H | -5.711950  | 2.608453  | -5.343733 |
| H | -7.428019  | 2.267332  | -4.942238 |
| H | -2.099969  | 2.758960  | -3.558711 |
| H | -10.661405 | 0.565052  | 0.395090  |
| H | -11.563726 | -0.286240 | -0.884992 |
| H | -9.941466  | -0.869385 | -0.380993 |
| H | -4.306522  | -1.371278 | 4.644107  |
| H | -2.571871  | -1.815771 | 4.611397  |
| H | -3.118830  | -0.302756 | 3.825211  |
| H | -1.155833  | 1.795702  | -1.247653 |
| H | -0.185277  | 0.817304  | -2.385758 |
| H | -0.058443  | 2.592866  | -2.417385 |
| N | -1.266029  | -3.263057 | 1.546635  |
| C | -0.265737  | -2.183669 | 1.542314  |
| C | -0.697169  | -1.081869 | 0.575003  |
| H | 0.729596   | -2.559589 | 1.235573  |
| H | -0.177943  | -1.768696 | 2.556282  |
| C | -0.754168  | -4.542915 | 2.041903  |
| H | -1.579439  | -3.361492 | 0.571465  |
| C | -1.839138  | -5.636661 | 1.987067  |
| H | -0.434304  | -4.397222 | 3.087883  |
| H | 0.146008   | -4.876037 | 1.480980  |
| N | -0.871363  | -1.668491 | -0.768579 |
| H | -1.649765  | -0.648767 | 0.894232  |

|   |           |           |           |
|---|-----------|-----------|-----------|
| H | 0.053649  | -0.275845 | 0.606249  |
| H | -1.255359 | -0.957115 | -1.411670 |
| N | -3.044387 | -5.421517 | 2.799928  |
| H | -2.167378 | -5.761762 | 0.943055  |
| H | -1.381588 | -6.591382 | 2.290836  |
| H | -2.757039 | -5.215742 | 3.763678  |
| H | -3.511663 | -4.565199 | 2.481663  |
| H | -6.363313 | -2.200590 | -1.839333 |
| H | -2.742573 | -2.548777 | 2.372403  |
| H | 0.045470  | -1.937277 | -1.143144 |
| H | -2.671284 | -2.341093 | -1.490455 |
| C | -5.033962 | 2.192682  | 1.553057  |
| O | -4.798548 | 2.604677  | 2.684342  |
| O | -4.184489 | 1.903079  | 0.597215  |
| H | -3.178019 | 2.130903  | 0.917498  |
| C | 8.869765  | -1.060503 | -2.424079 |
| N | 8.166214  | -2.214473 | -2.344523 |
| C | 7.903970  | -2.589298 | -1.072235 |
| N | 8.215849  | -1.908712 | 0.051890  |
| C | 8.880688  | -0.758039 | -0.184182 |
| N | 9.291008  | -0.299949 | -1.392196 |
| N | 9.129858  | 0.037226  | 0.907571  |
| N | 7.212778  | -3.767148 | -0.894749 |
| N | 9.167479  | -0.626442 | -3.687132 |
| C | 9.410990  | 1.475691  | 0.728892  |
| N | 8.552279  | 2.141652  | -0.244355 |
| C | 7.178433  | 2.036465  | -0.058828 |
| N | 6.462903  | 1.844491  | -1.183343 |
| C | 5.123659  | 1.794205  | -0.958493 |
| N | 4.501747  | 1.980626  | 0.220492  |
| C | 5.354792  | 2.082548  | 1.282865  |
| N | 6.713494  | 2.101156  | 1.203775  |
| N | 4.778303  | 2.157779  | 2.502421  |
| N | 4.368446  | 1.495791  | -2.060973 |
| C | 2.950963  | 1.145490  | -1.987781 |
| N | 2.579405  | 0.221752  | -0.915111 |
| C | 3.217553  | -0.967839 | -0.702512 |
| N | 3.923347  | -1.505610 | -1.719842 |
| C | 4.517946  | -2.677602 | -1.396032 |
| N | 4.435825  | -3.330746 | -0.218871 |
| C | 3.692605  | -2.675570 | 0.710857  |
| N | 3.076994  | -1.490788 | 0.546350  |
| N | 5.308295  | -3.248697 | -2.369557 |
| C | 6.324359  | -4.224786 | -1.965572 |

|   |           |           |           |
|---|-----------|-----------|-----------|
| N | 3.587636  | -3.297033 | 1.920815  |
| C | 9.506374  | 0.770107  | -3.947858 |
| C | 5.581065  | 2.113148  | 3.713686  |
| C | 3.120834  | -2.624757 | 3.128229  |
| H | 8.520143  | -0.193563 | 1.689439  |
| H | 6.765619  | -3.801636 | 0.021532  |
| H | 8.656976  | -1.130718 | -4.406200 |
| H | 10.442259 | 1.597312  | 0.384418  |
| H | 9.284852  | 1.943440  | 1.706760  |
| H | 8.784509  | 1.817924  | -1.185809 |
| H | 2.687970  | 0.705078  | -2.952839 |
| H | 2.369185  | 2.057860  | -1.814723 |
| H | 5.623066  | -2.567905 | -3.058433 |
| H | 5.823902  | -5.123887 | -1.599281 |
| H | 6.918368  | -4.455686 | -2.851491 |
| H | 4.199483  | -4.100764 | 2.018110  |
| H | 10.366980 | 1.052322  | -3.334106 |
| H | 9.772567  | 0.869192  | -5.005758 |
| H | 8.669333  | 1.447398  | -3.713560 |
| H | 6.371259  | 2.871088  | 3.672074  |
| H | 4.921168  | 2.317632  | 4.564373  |
| H | 6.063018  | 1.132136  | 3.865179  |
| H | 3.759833  | -1.769654 | 3.397527  |
| H | 2.096636  | -2.268100 | 2.987180  |
| H | 3.126846  | -3.353303 | 3.945421  |
| N | 0.038438  | 2.526965  | 2.491922  |
| C | 0.598966  | 2.176185  | 3.798319  |
| C | 1.326818  | 0.817939  | 3.734694  |
| H | -0.199608 | 2.121361  | 4.548687  |
| H | 1.311345  | 2.962889  | 4.084225  |
| C | 0.544213  | 3.699572  | 1.770377  |
| C | 0.714912  | 3.422735  | 0.250413  |
| H | 1.533088  | 3.929177  | 2.193370  |
| H | -0.104548 | 4.579338  | 1.923357  |
| N | 2.250646  | 0.860606  | 2.578097  |
| H | 1.902363  | 0.645111  | 4.657010  |
| H | 0.559486  | 0.038179  | 3.636585  |
| H | 2.481173  | -0.077885 | 2.226984  |
| N | 1.951567  | 3.905654  | -0.396056 |
| H | 0.678249  | 2.333224  | 0.111120  |
| H | -0.145040 | 3.822675  | -0.293238 |
| H | 2.040799  | 4.919430  | -0.267797 |
| H | 2.769392  | 3.479593  | 0.061402  |
| H | 4.916209  | 1.051085  | -2.791081 |

|   |           |          |           |
|---|-----------|----------|-----------|
| H | 3.787158  | 1.797225 | 2.561658  |
| H | 1.675378  | 1.289705 | 1.837397  |
| H | 2.353608  | 0.688929 | -0.041951 |
| C | -1.232280 | 1.965555 | 2.158754  |
| O | -1.799370 | 2.517917 | 1.138058  |
| O | -1.621119 | 0.997905 | 2.854082  |

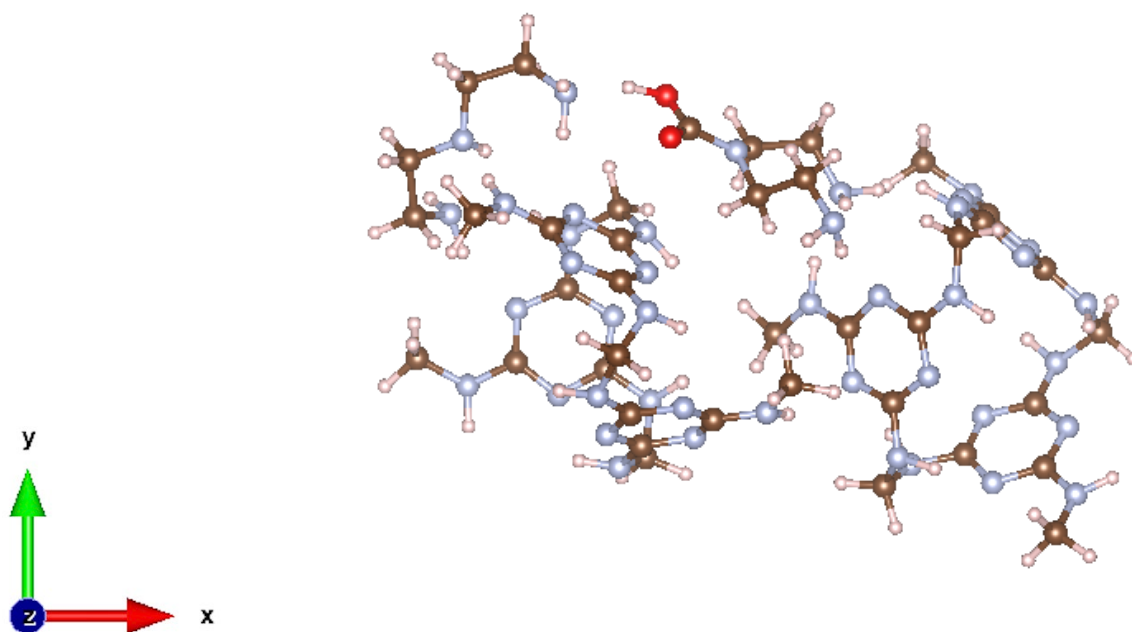

**Fig. S16. DFT-calculated structure of CO<sub>2</sub>-reacted ammonium carbamate pair within MNMs DETA (Structure 1).** The structure was obtained by DFT calculation at the TPSS-D3(BJ)/6-31G\* level.

Coordinates:

|   | X         | Y         | Z         |
|---|-----------|-----------|-----------|
| C | -0.895793 | -3.049998 | 1.611716  |
| N | -1.369692 | -3.497857 | 0.417312  |
| C | -2.702213 | -3.707379 | 0.418905  |
| N | -3.572525 | -3.431053 | 1.416869  |
| C | -2.973618 | -2.911282 | 2.508966  |
| N | -1.645574 | -2.754833 | 2.700478  |
| N | -3.800313 | -2.459254 | 3.512951  |
| N | -3.259981 | -4.239331 | -0.727527 |
| N | 0.442801  | -2.872554 | 1.711260  |
| C | -3.295239 | -1.432118 | 4.447042  |
| N | -2.557498 | -0.356373 | 3.787145  |

|   |           |           |           |
|---|-----------|-----------|-----------|
| C | -3.228822 | 0.423920  | 2.861809  |
| N | -2.571968 | 0.636626  | 1.704800  |
| C | -3.224184 | 1.464564  | 0.857079  |
| N | -4.397194 | 2.083079  | 1.081790  |
| C | -4.962312 | 1.748165  | 2.282145  |
| N | -4.451923 | 0.885336  | 3.191361  |
| N | -6.137898 | 2.353195  | 2.565843  |
| N | -2.593222 | 1.656783  | -0.346894 |
| C | -3.261561 | 2.236366  | -1.499806 |
| N | -4.498120 | 1.580587  | -1.923857 |
| C | -4.568853 | 0.240130  | -2.139310 |
| N | -3.415169 | -0.460825 | -2.198168 |
| C | -3.600589 | -1.794388 | -2.353083 |
| N | -4.780762 | -2.434949 | -2.492619 |
| C | -5.852106 | -1.605771 | -2.461422 |
| N | -5.826234 | -0.273669 | -2.270771 |
| N | -2.470684 | -2.575039 | -2.348740 |
| C | -2.598983 | -3.998674 | -2.006049 |
| N | -7.065778 | -2.200983 | -2.633884 |
| C | 1.056754  | -2.168705 | 2.830315  |
| C | -6.880127 | 2.085937  | 3.785613  |
| C | -8.330699 | -1.515584 | -2.423918 |
| H | -4.758391 | -2.338048 | 3.190941  |
| H | -4.267745 | -4.086123 | -0.763916 |
| H | 0.974809  | -2.918356 | 0.839042  |
| H | -2.611823 | -1.905697 | 5.156259  |
| H | -4.156851 | -1.015042 | 4.970592  |
| H | -1.715885 | -0.748150 | 3.354017  |
| H | -2.535045 | 2.209205  | -2.317940 |
| H | -3.510409 | 3.277678  | -1.281170 |
| H | -1.675039 | -2.109695 | -1.918248 |
| H | -3.189096 | -4.493296 | -2.779593 |
| H | -1.590272 | -4.412717 | -1.969699 |
| H | -7.039895 | -3.214793 | -2.652837 |
| H | 0.631758  | -2.538273 | 3.767667  |
| H | 2.133158  | -2.363924 | 2.814680  |
| H | 0.887781  | -1.080520 | 2.773154  |
| H | -6.186399 | 2.007332  | 4.629421  |
| H | -7.577555 | 2.914646  | 3.956301  |
| H | -7.454055 | 1.146742  | 3.727765  |
| H | -8.442114 | -1.164622 | -1.386332 |
| H | -8.407858 | -0.649100 | -3.091861 |
| H | -9.141424 | -2.213708 | -2.654425 |
| N | -7.191833 | 3.964841  | 0.399190  |

|   |           |           |           |
|---|-----------|-----------|-----------|
| C | -8.538445 | 3.459812  | 0.108254  |
| C | -8.392559 | 2.049477  | -0.485167 |
| H | -9.079871 | 4.113393  | -0.606404 |
| H | -9.133728 | 3.425548  | 1.032506  |
| C | -7.083737 | 5.410087  | 0.633603  |
| H | -6.624496 | 3.693789  | -0.415907 |
| C | -5.634567 | 5.871135  | 0.397890  |
| H | -7.393193 | 5.624834  | 1.668480  |
| H | -7.751590 | 5.989832  | -0.034703 |
| N | -7.503724 | 2.101583  | -1.661179 |
| H | -7.906491 | 1.400293  | 0.254101  |
| H | -9.393852 | 1.635591  | -0.698606 |
| H | -7.192049 | 1.151522  | -1.927577 |
| N | -4.592840 | 5.159032  | 1.155244  |
| H | -1.931712 | 0.911910  | -0.548522 |
| H | -6.543199 | 2.945322  | 1.811682  |
| H | -8.001068 | 2.496934  | -2.465181 |
| H | -5.389091 | 2.019693  | -1.665049 |
| H | -4.670369 | 5.322478  | 2.162990  |
| H | -3.016018 | 5.282019  | 0.691779  |
| H | -4.665405 | 4.133959  | 1.028876  |
| H | -5.397765 | 5.744507  | -0.670243 |
| H | -5.553768 | 6.944057  | 0.615776  |
| C | 7.411401  | -4.245546 | -0.795614 |
| N | 8.000800  | -3.229149 | -1.470073 |
| C | 7.187530  | -2.648265 | -2.377741 |
| N | 5.890930  | -2.951425 | -2.614380 |
| C | 5.417501  | -3.922489 | -1.808114 |
| N | 6.121566  | -4.635587 | -0.896428 |
| N | 4.067364  | -4.183630 | -1.891694 |
| N | 7.716440  | -1.620454 | -3.125171 |
| N | 8.208101  | -4.922894 | 0.076015  |
| C | 3.393476  | -4.712694 | -0.697874 |
| N | 3.742964  | -3.999770 | 0.536385  |
| C | 3.613980  | -2.626348 | 0.554344  |
| N | 4.505973  | -1.951222 | 1.297401  |
| C | 4.270381  | -0.612217 | 1.345075  |
| N | 3.269052  | 0.050324  | 0.725445  |
| C | 2.495126  | -0.747200 | -0.068913 |
| N | 2.603689  | -2.097982 | -0.176218 |
| N | 1.531263  | -0.138844 | -0.795685 |
| N | 5.162708  | 0.078215  | 2.111497  |
| C | 5.288450  | 1.530190  | 2.217096  |
| N | 5.230288  | 2.275522  | 0.963940  |

|   |           |           |           |
|---|-----------|-----------|-----------|
| C | 5.863901  | 1.904002  | -0.187565 |
| N | 6.901388  | 1.049518  | -0.103865 |
| C | 7.427062  | 0.732709  | -1.312909 |
| N | 7.026679  | 1.194230  | -2.516627 |
| C | 5.995067  | 2.071845  | -2.443593 |
| N | 5.353055  | 2.454598  | -1.322454 |
| N | 8.474347  | -0.154817 | -1.312260 |
| C | 8.819036  | -0.845015 | -2.558715 |
| N | 5.577482  | 2.600299  | -3.626456 |
| C | 7.703671  | -5.901014 | 1.028969  |
| C | 0.659982  | -0.892488 | -1.684663 |
| C | 4.380140  | 3.416993  | -3.761417 |
| H | 3.569559  | -3.421011 | -2.348578 |
| H | 6.995046  | -1.040770 | -3.553322 |
| H | 9.124058  | -4.510019 | 0.217434  |
| H | 3.680474  | -5.756299 | -0.552363 |
| H | 2.318081  | -4.641891 | -0.871375 |
| H | 4.660866  | -4.278464 | 0.885809  |
| H | 6.250281  | 1.705140  | 2.709975  |
| H | 4.474425  | 1.924113  | 2.839143  |
| H | 8.534244  | -0.714689 | -0.464331 |
| H | 9.108572  | -0.098572 | -3.300450 |
| H | 9.650500  | -1.517056 | -2.343451 |
| H | 6.001451  | 2.189555  | -4.451357 |
| H | 7.012684  | -6.576353 | 0.515734  |
| H | 8.550304  | -6.474920 | 1.420330  |
| H | 7.170006  | -5.429001 | 1.869934  |
| H | 0.191769  | -1.713803 | -1.127217 |
| H | -0.116247 | -0.214852 | -2.058245 |
| H | 1.201444  | -1.323499 | -2.541102 |
| H | 3.456793  | 2.826180  | -3.652158 |
| H | 4.386629  | 4.198426  | -2.994134 |
| H | 4.390355  | 3.885918  | -4.750610 |
| N | -0.314990 | 3.685968  | 0.770535  |
| C | 0.061484  | 3.766757  | -0.642727 |
| C | 1.568311  | 3.915194  | -0.906380 |
| H | -0.459971 | 4.634109  | -1.052548 |
| H | -0.291193 | 2.868260  | -1.180662 |
| C | 0.216398  | 2.581175  | 1.581448  |
| C | 1.410993  | 3.005986  | 2.457960  |
| H | 0.507633  | 1.765887  | 0.903161  |
| H | -0.594335 | 2.207134  | 2.213871  |
| N | 2.294021  | 2.632888  | -0.795508 |
| H | 1.685481  | 4.249896  | -1.946673 |

|   |           |           |           |
|---|-----------|-----------|-----------|
| H | 1.975136  | 4.710223  | -0.257628 |
| H | 3.250436  | 2.708002  | -1.176355 |
| N | 2.117154  | 1.887230  | 3.110690  |
| H | 2.143679  | 3.563927  | 1.853004  |
| H | 1.059510  | 3.702798  | 3.228868  |
| H | 1.483796  | 1.439506  | 3.781472  |
| H | 2.326376  | 1.174429  | 2.396896  |
| H | 5.995723  | -0.467612 | 2.307690  |
| H | 1.651671  | 0.886306  | -0.943105 |
| H | 2.422290  | 2.361467  | 0.184016  |
| H | 4.359722  | 2.767832  | 0.789584  |
| C | -1.499788 | 4.249360  | 1.216087  |
| O | -1.973764 | 4.028069  | 2.336633  |
| O | -2.073895 | 5.075916  | 0.309281  |

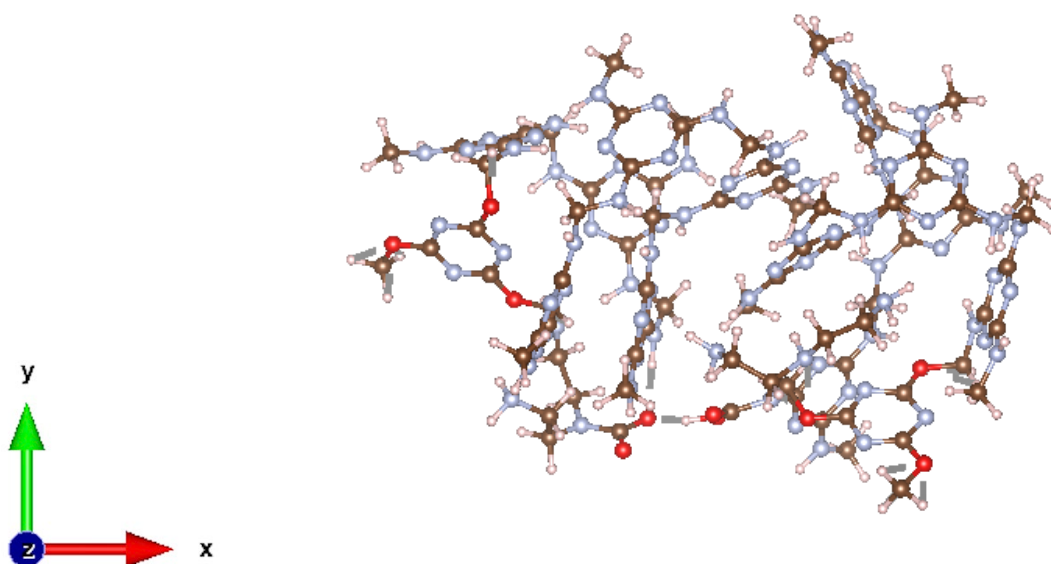

**Fig. S17. DFT-calculated structure of CO<sub>2</sub>-reacted mixed ammonium carbamate and carbamic acid within MNNS<sup>cy<sup>a</sup></sup> DETA (Structure 1).** The structure was obtained by DFT calculation at the TPSS-D3(BJ)/6-31G\* level.

Coordinates:

|   | X        | Y         | Z         |
|---|----------|-----------|-----------|
| C | 3.008037 | -5.411618 | -4.429463 |
| N | 2.098896 | -5.585046 | -3.434504 |
| C | 2.102350 | -4.592498 | -2.540014 |
| N | 2.890308 | -3.498548 | -2.564541 |
| C | 3.819509 | -3.508619 | -3.538447 |
| N | 3.936538 | -4.434638 | -4.519545 |
| N | 4.729666 | -2.488645 | -3.567639 |



|   |           |           |           |
|---|-----------|-----------|-----------|
| N | 1.272389  | -4.697489 | -1.404127 |
| N | 2.976267  | -6.369393 | -5.399750 |
| C | 4.854560  | -1.452235 | -2.555880 |
| C | 1.803857  | -4.242411 | -0.157326 |
| N | 4.925918  | -0.143952 | -3.190559 |
| C | 5.905874  | 0.790862  | -3.036932 |
| N | 5.559571  | 2.025393  | -3.503331 |
| C | 6.525567  | 2.951281  | -3.370041 |
| N | 7.737325  | 2.771592  | -2.803567 |
| C | 7.942876  | 1.515975  | -2.345178 |
| N | 7.080041  | 0.459867  | -2.453494 |
| N | 9.120739  | 1.281156  | -1.709759 |
| N | 6.298049  | 4.210923  | -3.870880 |
| C | 10.020463 | 2.388287  | -1.406994 |
| C | 4.960326  | 4.734388  | -4.085613 |
| N | 4.592407  | 5.770920  | -3.124502 |
| C | 4.348877  | 5.562214  | -1.786704 |
| N | 4.773910  | 4.409378  | -1.235557 |
| C | 4.545596  | 4.338613  | 0.098809  |
| N | 3.979131  | 5.319709  | 0.865709  |
| C | 3.565064  | 6.391414  | 0.158777  |
| N | 3.725627  | 6.591415  | -1.167327 |
| N | 4.954376  | 3.256228  | 0.786802  |
| N | 2.895608  | 7.370596  | 0.840426  |
| C | 2.902082  | 7.460086  | 2.295418  |
| C | 7.833672  | -3.511573 | -1.117561 |
| N | 8.235997  | -2.164898 | -0.836550 |
| O | 6.491515  | -6.894640 | 2.184472  |
| C | 5.776752  | -6.091245 | 1.363673  |
| N | 6.546874  | -5.299271 | 0.586165  |
| C | 5.804194  | -4.471419 | -0.163093 |
| N | 4.472423  | -4.377523 | -0.189838 |
| C | 3.839513  | -5.271374 | 0.584353  |
| N | 4.445302  | -6.164606 | 1.405704  |
| O | 2.514470  | -5.342816 | 0.552247  |
| O | 6.387816  | -3.631668 | -1.044761 |
| C | 5.706396  | -7.749532 | 3.046567  |
| N | 2.229723  | 0.819407  | 3.740269  |
| C | 2.359280  | 0.498497  | 2.408583  |
| N | 3.433171  | 1.004331  | 1.751876  |
| C | 3.401988  | 0.712133  | 0.427560  |
| N | 2.460237  | 0.018800  | -0.235839 |
| C | 1.482050  | -0.484909 | 0.563742  |
| N | 1.396865  | -0.290034 | 1.915768  |

|   |           |           |           |
|---|-----------|-----------|-----------|
| N | 4.453309  | 1.145266  | -0.340099 |
| N | 0.522259  | -1.239585 | 0.008475  |
| C | 0.456606  | -1.486787 | -1.428233 |
| C | 8.566625  | -1.770838 | 0.433949  |
| N | 8.564713  | -2.704179 | 1.399292  |
| C | 8.993244  | -2.259264 | 2.596573  |
| N | 9.434268  | -1.001531 | 2.876419  |
| C | 9.349200  | -0.157685 | 1.827090  |
| N | 8.913172  | -0.471978 | 0.584072  |
| N | 9.754288  | 1.140670  | 2.019703  |
| N | 8.992163  | -3.136966 | 3.633220  |
| C | 5.465240  | 2.036149  | 0.185973  |
| C | 8.333522  | -4.439385 | 3.588379  |
| N | 8.909575  | 1.420298  | 4.311304  |
| C | 7.699249  | 2.050882  | 4.081042  |
| N | 7.733113  | 3.260376  | 3.476709  |
| C | 6.504786  | 3.821825  | 3.359041  |
| N | 5.331362  | 3.283633  | 3.771566  |
| C | 5.444790  | 2.048673  | 4.319172  |
| N | 6.617143  | 1.374479  | 4.496640  |
| N | 4.329949  | 1.410147  | 4.746776  |
| N | 6.419399  | 5.051347  | 2.769226  |
| C | 7.501522  | 5.541550  | 1.923293  |
| C | 2.995048  | 1.869201  | 4.378516  |
| C | 10.005594 | 1.634461  | 3.382527  |
| C | 3.863595  | -6.421964 | -6.544263 |
| N | -0.606439 | -3.062895 | 2.007476  |
| C | -0.062601 | -3.336015 | 3.349555  |
| C | 1.273324  | -4.097270 | 3.241957  |
| N | 2.426931  | -3.295340 | 2.789127  |
| C | 3.123600  | -2.605537 | 3.879324  |
| C | 4.466484  | -2.041591 | 3.398586  |
| N | 5.137244  | -1.354762 | 4.526625  |
| H | 5.455327  | -2.575546 | -4.272334 |
| H | 2.253771  | -7.069786 | -5.267086 |
| H | 3.976160  | -1.513788 | -1.906093 |
| H | 5.751337  | -1.578290 | -1.949708 |
| H | 0.986399  | -3.989279 | 0.507493  |
| H | 2.511862  | -3.432635 | -0.311054 |
| H | 4.076099  | 0.207225  | -3.622439 |
| H | 9.095840  | 0.523769  | -1.006169 |
| H | 7.005558  | 4.882888  | -3.582244 |
| H | 10.391850 | 2.839453  | -2.333856 |
| H | 10.861828 | 1.984367  | -0.833422 |

|   |           |           |           |
|---|-----------|-----------|-----------|
| H | 9.527141  | 3.185575  | -0.826469 |
| H | 4.894358  | 5.208353  | -5.073219 |
| H | 4.281429  | 3.877372  | -4.060736 |
| H | 4.123620  | 6.596242  | -3.486110 |
| H | 4.596247  | 3.157518  | 1.741672  |
| H | 2.748540  | 8.217201  | 0.300116  |
| H | 2.543933  | 6.521508  | 2.729517  |
| H | 2.226764  | 8.268770  | 2.593376  |
| H | 3.907548  | 7.658457  | 2.700451  |
| H | 8.296163  | -4.196770 | -0.406374 |
| H | 8.087085  | -3.752170 | -2.153818 |
| H | 7.964443  | -1.415544 | -1.487163 |
| H | 6.446878  | -8.304562 | 3.629393  |
| H | 5.082757  | -8.426009 | 2.452618  |
| H | 5.058942  | -7.149599 | 3.695699  |
| H | 1.347374  | 0.527959  | 4.147109  |
| H | 4.220889  | 1.222911  | -1.325767 |
| H | -0.015820 | -1.817646 | 0.683081  |
| H | 1.408424  | -1.876471 | -1.808482 |
| H | 0.216409  | -0.555583 | -1.956307 |
| H | -0.331911 | -2.219062 | -1.610202 |
| H | 9.326942  | 1.802674  | 1.376145  |
| H | 9.246412  | -2.731636 | 4.528791  |
| H | 6.026217  | 1.517035  | 0.968979  |
| H | 6.131979  | 2.306434  | -0.633036 |
| H | 8.148474  | -4.692930 | 2.541913  |
| H | 7.369251  | -4.410910 | 4.118298  |
| H | 8.974612  | -5.201436 | 4.048958  |
| H | 8.773632  | 0.426403  | 4.503779  |
| H | 4.453053  | 0.385981  | 4.908931  |
| H | 5.471473  | 5.283319  | 2.454046  |
| H | 8.442534  | 5.497568  | 2.479311  |
| H | 7.281501  | 6.579776  | 1.650818  |
| H | 7.609808  | 4.945606  | 1.001360  |
| H | 3.117004  | 2.733912  | 3.717708  |
| H | 2.435605  | 2.171984  | 5.273833  |
| H | 10.204718 | 2.704074  | 3.304599  |
| H | 10.879439 | 1.110621  | 3.778856  |
| H | 4.536273  | -5.563185 | -6.470708 |
| H | 3.300352  | -6.362105 | -7.487828 |
| H | 4.458041  | -7.348569 | -6.546901 |
| H | -0.838091 | -3.941645 | 1.525614  |
| H | -1.489147 | -2.536119 | 2.066059  |
| H | -0.760924 | -3.921917 | 3.979768  |

|   |            |           |           |
|---|------------|-----------|-----------|
| H | 0.099260   | -2.368180 | 3.845416  |
| H | 1.143787   | -4.941355 | 2.548334  |
| H | 1.530113   | -4.529824 | 4.220135  |
| H | 2.073915   | -2.579739 | 2.143433  |
| H | 3.319683   | -3.351634 | 4.667637  |
| H | 2.547889   | -1.783319 | 4.344065  |
| H | 4.303491   | -1.290030 | 2.617134  |
| H | 5.062667   | -2.857464 | 2.954325  |
| H | 5.432238   | -2.042802 | 5.226772  |
| H | 5.987116   | -0.869838 | 4.215264  |
| C | -0.108358  | -5.115780 | -1.411205 |
| O | -0.560994  | -5.284044 | -2.625084 |
| O | -0.707688  | -5.210687 | -0.337713 |
| H | -1.644100  | -5.419585 | -2.698007 |
| H | -6.686864  | -2.514801 | -5.197609 |
| H | -7.255269  | 4.810724  | -4.592721 |
| N | -6.100365  | 3.090984  | -4.684710 |
| H | -6.909126  | 2.483789  | -4.574436 |
| H | -10.686139 | 3.955179  | -3.005390 |
| C | -6.261507  | 4.479111  | -4.289165 |
| H | -5.485194  | 5.066112  | -4.783188 |
| H | -6.256376  | -4.983718 | -4.661978 |
| N | -6.064094  | -2.207690 | -4.443315 |
| C | -4.890655  | 2.464019  | -4.435635 |
| N | -4.871225  | 1.129238  | -4.565155 |
| H | -4.573351  | -4.427022 | -4.503781 |
| H | -12.563510 | 3.225593  | -1.649390 |
| H | -11.429208 | 0.194299  | -2.309101 |
| H | -13.082552 | 0.069617  | -1.598087 |
| C | -5.504999  | -4.585462 | -3.953501 |
| N | -10.568746 | 3.714559  | -2.025485 |
| H | -6.476269  | -1.347446 | -4.065843 |
| H | -4.407506  | -1.282731 | -4.658018 |
| C | -12.020326 | -0.144168 | -1.450769 |
| N | -8.354172  | 4.143392  | -2.507473 |
| C | -11.733619 | 3.734337  | -1.146825 |
| N | -3.527329  | -0.749749 | -4.511375 |
| C | -3.633259  | 0.588426  | -4.352717 |
| N | -3.865027  | 3.282645  | -4.096328 |
| C | -6.005305  | -3.241920 | -3.386334 |
| H | -12.039914 | 4.762239  | -0.892020 |
| H | -1.916386  | -2.059079 | -4.879226 |
| N | -6.123361  | 4.717145  | -2.848853 |
| C | -9.298982  | 3.907895  | -1.563562 |

|   |            |           |           |
|---|------------|-----------|-----------|
| H | -11.850756 | -1.214892 | -1.295490 |
| C | -2.692598  | 2.617931  | -3.924259 |
| N | -2.515786  | 1.283747  | -4.030221 |
| H | -6.980631  | -3.385481 | -2.883569 |
| N | -5.223774  | -5.578721 | -2.927213 |
| C | -2.369157  | -1.510725 | -4.044425 |
| C | -7.125313  | 4.355591  | -1.991362 |
| O | -2.959378  | -5.346123 | -3.209915 |
| H | -7.256063  | -5.803071 | -2.575959 |
| H | -2.313801  | 5.303755  | -3.694393 |
| O | -11.660992 | 0.606036  | -0.269589 |
| C | -3.909178  | -5.794859 | -2.438710 |
| N | -1.576779  | 3.342259  | -3.627843 |
| H | -11.484876 | 3.197885  | -0.228853 |
| H | -5.288443  | -2.907486 | -2.630801 |
| H | -5.176766  | 4.552723  | -2.503246 |
| C | -6.309853  | -5.997644 | -2.044393 |
| C | -1.674706  | 4.680839  | -3.060826 |
| H | -1.645931  | -0.795671 | -3.644433 |
| H | -2.808641  | -3.499861 | -3.288977 |
| H | -6.230470  | -7.080231 | -1.879737 |
| H | 1.344194   | 2.359211  | -4.443318 |
| N | -2.739371  | -2.492196 | -3.054677 |
| N | -9.580916  | -0.361975 | -0.531036 |
| N | -9.106207  | 3.822463  | -0.232176 |
| C | -10.379004 | 0.484668  | 0.132962  |
| H | -0.667583  | 5.110298  | -3.018961 |
| H | -0.806420  | 2.762522  | -3.258733 |
| C | 2.176884   | 1.884328  | -3.907715 |
| N | -6.790256  | 4.273484  | -0.678209 |
| H | 3.077034   | 1.923647  | -4.530924 |
| H | 1.888848   | 0.840420  | -3.713271 |
| O | -3.792714  | -6.429712 | -1.365579 |
| O | -7.516548  | -1.290003 | -0.614858 |
| C | -7.820919  | 3.978356  | 0.140952  |
| H | -8.008604  | -4.097489 | -0.959449 |
| C | -8.335433  | -0.424569 | -0.012234 |
| C | -6.314323  | -5.255459 | -0.676736 |
| H | -4.907278  | 7.198882  | -0.878114 |
| H | -2.091450  | 4.665727  | -2.039346 |
| C | -2.998141  | -2.228708 | -1.745231 |
| N | -10.069624 | 1.252791  | 1.195945  |
| H | -1.810536  | 1.054247  | -1.873068 |
| H | -5.591770  | -4.435207 | -0.744010 |

|   |           |           |           |
|---|-----------|-----------|-----------|
| N | -7.606032 | -4.685943 | -0.220959 |
| H | -3.279623 | 6.450803  | -0.926492 |
| N | -2.876313 | -0.967569 | -1.256416 |
| C | -4.087545 | 6.804539  | -0.267478 |
| H | -5.655671 | -2.068925 | -0.691752 |
| H | -8.284428 | -5.432786 | -0.044784 |
| N | -3.366130 | -3.316215 | -1.043783 |
| H | -3.712031 | 1.687211  | -0.647070 |
| N | 2.472171  | 2.593602  | -2.671197 |
| N | 0.371220  | 2.081256  | -1.859908 |
| C | -6.233074 | -1.591358 | 0.099276  |
| H | -5.435223 | 5.217973  | 0.177756  |
| N | -1.696038 | 1.607500  | -1.020073 |
| N | -7.871904 | 0.311632  | 1.009609  |
| H | -5.954208 | -5.920402 | 0.113448  |
| C | -8.781828 | 1.132148  | 1.547196  |
| N | -7.523307 | 3.877845  | 1.478744  |
| N | -4.631488 | 5.739703  | 0.566032  |
| H | -9.481876 | 3.562994  | 2.075688  |
| C | -2.785061 | 1.543290  | -0.074192 |
| C | 1.582483  | 2.632581  | -1.640515 |
| H | 3.429352  | 2.877127  | -2.458596 |
| C | -0.467241 | 2.128348  | -0.786806 |
| H | -5.783442 | -0.665926 | 0.454650  |
| H | -3.678953 | 7.605942  | 0.359135  |
| C | -2.981876 | -0.922216 | 0.097980  |
| C | -8.467580 | 3.340932  | 2.412349  |
| H | -6.932504 | -3.380860 | 0.961305  |
| N | -6.472742 | -2.472773 | 1.185768  |
| C | -3.364533 | -3.151771 | 0.295014  |
| H | -6.516108 | 3.848684  | 1.715411  |
| O | -8.310482 | 1.891122  | 2.571653  |
| N | -2.846358 | 0.299488  | 0.686872  |
| C | -3.822332 | 5.025429  | 1.389688  |
| H | -2.660995 | 2.353537  | 0.641526  |
| H | -3.541001 | -5.135932 | 0.411611  |
| N | -3.169647 | -1.970899 | 0.941006  |
| N | 1.982664  | 3.246441  | -0.506139 |
| N | -3.571964 | -4.291751 | 0.995714  |
| N | -0.184647 | 2.681022  | 0.415858  |
| N | -4.393380 | 3.947839  | 2.019179  |
| N | -2.539517 | 5.427289  | 1.503970  |
| H | -8.265116 | 3.726595  | 3.412756  |
| C | -6.356238 | -2.118290 | 2.496914  |

|   |           |           |          |
|---|-----------|-----------|----------|
| C | 1.052491  | 3.220582  | 0.472644 |
| H | -5.759817 | 1.413278  | 2.564783 |
| H | -3.055978 | 0.353110  | 1.680197 |
| N | -5.805980 | -0.917140 | 2.791777 |
| C | -3.512601 | 3.260756  | 2.782093 |
| C | -1.793847 | 4.652064  | 2.325457 |
| N | -6.797589 | -3.030559 | 3.393905 |
| C | -3.707233 | -4.371839 | 2.436540 |
| C | -5.346200 | 1.737690  | 3.522042 |
| H | -0.208353 | 5.754305  | 1.823214 |
| H | -4.644479 | -4.876488 | 2.707870 |
| N | -3.930675 | 2.099639  | 3.369681 |
| N | -2.216252 | 3.574006  | 3.011902 |
| H | -5.912708 | 2.607999  | 3.884961 |
| N | -0.483687 | 5.028781  | 2.483882 |
| N | 1.442749  | 3.811556  | 1.647772 |
| H | -3.734119 | -3.351913 | 2.831080 |
| C | -5.861516 | -0.613304 | 4.093643 |
| H | 2.323614  | 4.333617  | 1.592103 |
| H | -2.862318 | -4.913282 | 2.888627 |
| N | -5.458083 | 0.651572  | 4.468574 |
| C | -6.678609 | -2.623636 | 4.676594 |
| C | 0.551768  | 4.017112  | 2.762579 |
| H | -3.288443 | 1.721089  | 4.060932 |
| H | 0.023442  | 3.092175  | 3.010165 |
| N | -6.270728 | -1.409089 | 5.109274 |
| H | -7.485131 | -4.368915 | 5.241855 |
| N | -7.016686 | -3.553422 | 5.624672 |
| H | -5.665020 | 0.868621  | 5.438765 |
| H | 1.166428  | 4.334911  | 3.613202 |
| C | -7.218424 | -3.213069 | 7.023144 |
| H | -8.201664 | -2.748872 | 7.211457 |
| H | -6.442395 | -2.501551 | 7.318415 |
| H | -7.130958 | -4.123592 | 7.628052 |

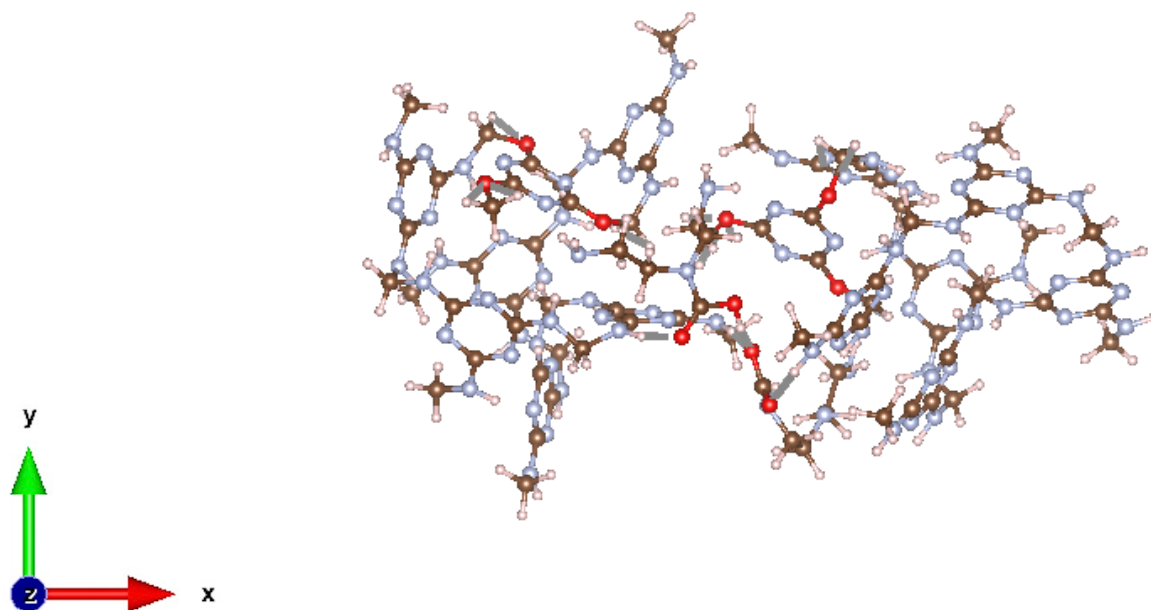

**Fig. S18. DFT-calculated structure of CO<sub>2</sub>-reacted mixed ammonium carbamate and carbamic acid within MNNS<sup>cv^a</sup>  $\supset$  DETA (Structure 2).** The structure was obtained by DFT calculation at the TPSS-D3(BJ)/6-31G\* level.

Coordinates:

|   | X          | Y         | Z         |
|---|------------|-----------|-----------|
| C | -2.466849  | 5.869405  | -1.486138 |
| N | -2.222828  | 5.066479  | -0.426743 |
| C | -2.850471  | 3.869525  | -0.506100 |
| N | -3.605262  | 3.450277  | -1.552520 |
| C | -3.868433  | 4.403140  | -2.452862 |
| N | -3.319548  | 5.638845  | -2.512984 |
| N | -4.794777  | 4.089379  | -3.429666 |
| N | -2.703532  | 3.016477  | 0.543541  |
| N | -1.776829  | 7.057438  | -1.497662 |
| C | -5.860671  | 3.146216  | -3.130130 |
| C | -3.424976  | 1.796284  | 0.632215  |
| N | -5.795109  | 1.992331  | -4.025361 |
| C | -6.764934  | 1.033538  | -4.040477 |
| N | -6.442942  | -0.091745 | -4.732721 |
| C | -7.458280  | -0.967702 | -4.830488 |
| N | -8.695455  | -0.838146 | -4.301204 |
| C | -8.860491  | 0.288841  | -3.574059 |
| N | -7.938061  | 1.287404  | -3.409889 |
| N | -10.053297 | 0.442718  | -2.942580 |
| N | -7.246018  | -2.111635 | -5.567863 |
| C | -11.027954 | -0.640217 | -2.924451 |



|   |            |           |           |
|---|------------|-----------|-----------|
| C | -5.907827  | -2.714662 | -5.636630 |
| N | -5.857951  | -4.035579 | -5.033974 |
| C | -6.164528  | -4.250488 | -3.710031 |
| N | -6.218674  | -3.161701 | -2.919589 |
| C | -6.553470  | -3.442961 | -1.636405 |
| N | -6.802162  | -4.687143 | -1.137912 |
| C | -6.681826  | -5.675777 | -2.045040 |
| N | -6.366392  | -5.538222 | -3.356842 |
| N | -6.683307  | -2.415252 | -0.769262 |
| N | -6.927748  | -6.947521 | -1.613811 |
| C | -7.071197  | -7.276157 | -0.199733 |
| C | -8.408963  | 4.875953  | -1.155959 |
| N | -9.217082  | 3.717920  | -1.408303 |
| O | -8.482384  | 3.149400  | 3.369389  |
| C | -7.515113  | 3.142945  | 2.433132  |
| N | -7.828477  | 3.874474  | 1.343706  |
| C | -6.879763  | 3.832420  | 0.403413  |
| N | -5.717731  | 3.168980  | 0.457825  |
| C | -5.519300  | 2.510347  | 1.607747  |
| N | -6.384650  | 2.461102  | 2.655426  |
| O | -4.400542  | 1.815721  | 1.772409  |
| O | -7.047016  | 4.514369  | -0.751855 |
| C | -8.240729  | 2.354491  | 4.559124  |
| N | -3.847158  | -1.947268 | 3.015392  |
| C | -3.469081  | -1.650594 | 1.736508  |
| N | -4.443536  | -1.471270 | 0.806824  |
| C | -3.949467  | -1.260280 | -0.432994 |
| N | -2.663103  | -1.347531 | -0.824647 |
| C | -1.796972  | -1.532030 | 0.213716  |
| N | -2.141629  | -1.574090 | 1.524483  |
| N | -4.865728  | -0.892889 | -1.400462 |
| N | -0.469608  | -1.662913 | -0.044781 |
| C | 0.023132   | -2.089291 | -1.350313 |
| C | -10.107882 | 3.292974  | -0.445345 |
| N | -10.595144 | 4.225462  | 0.392760  |
| C | -11.266606 | 3.706384  | 1.436062  |
| N | -11.569715 | 2.400864  | 1.628399  |
| C | -11.154610 | 1.595891  | 0.630576  |
| N | -10.404042 | 1.974961  | -0.434687 |
| N | -11.487514 | 0.266466  | 0.728849  |
| N | -11.687763 | 4.570882  | 2.406539  |
| C | -6.284970  | -1.056612 | -1.123800 |
| C | -11.044046 | 5.874775  | 2.566418  |
| N | -10.631455 | -0.271504 | 2.960605  |

|   |            |           |           |
|---|------------|-----------|-----------|
| C | -9.576387  | -1.114628 | 2.648348  |
| N | -9.873343  | -2.110163 | 1.780921  |
| C | -8.821698  | -2.925819 | 1.527614  |
| N | -7.580178  | -2.802909 | 2.044949  |
| C | -7.419640  | -1.769012 | 2.914943  |
| N | -8.396871  | -0.867190 | 3.243026  |
| N | -6.215748  | -1.617101 | 3.502307  |
| N | -9.017304  | -3.967996 | 0.670729  |
| C | -10.169328 | -3.997461 | -0.219407 |
| C | -5.121171  | -2.567875 | 3.318552  |
| C | -11.785811 | -0.260612 | 2.069795  |
| C | -2.165848  | 8.167731  | -2.355939 |
| N | -0.757504  | 2.986362  | 2.639375  |
| C | -1.111334  | 1.633745  | 3.122518  |
| C | -0.823807  | 1.345786  | 4.612836  |
| N | -1.485468  | 0.114772  | 5.070475  |
| C | -2.832747  | 0.195312  | 5.642375  |
| C | -3.834411  | 0.850018  | 4.679626  |
| N | -5.247055  | 0.679712  | 5.092084  |
| H | -5.017732  | 4.875301  | -4.033927 |
| H | -1.956874  | 3.206346  | 1.261390  |
| H | -1.340524  | 7.269113  | -0.604696 |
| H | -5.757458  | 2.847641  | -2.082712 |
| H | -6.837325  | 3.617433  | -3.280581 |
| H | -2.783628  | 0.965648  | 0.921502  |
| H | -3.972669  | 1.601878  | -0.289137 |
| H | -4.865102  | 1.663265  | -4.271088 |
| H | -10.077487 | 1.075326  | -2.129602 |
| H | -8.013633  | -2.772892 | -5.464306 |
| H | -11.368213 | -0.864307 | -3.941989 |
| H | -11.878294 | -0.310650 | -2.317338 |
| H | -10.609696 | -1.566397 | -2.500105 |
| H | -5.585339  | -2.829809 | -6.678484 |
| H | -5.230884  | -2.027661 | -5.120873 |
| H | -5.973862  | -4.852113 | -5.625994 |
| H | -6.644133  | -2.647111 | 0.232892  |
| H | -6.660672  | -7.672072 | -2.271016 |
| H | -6.198471  | -6.956600 | 0.387491  |
| H | -7.194565  | -8.360803 | -0.113526 |
| H | -7.958250  | -6.784202 | 0.217110  |
| H | -8.899015  | 5.474014  | -0.385652 |
| H | -8.226763  | 5.444287  | -2.070698 |
| H | -8.814038  | 2.986089  | -2.010188 |
| H | -9.136854  | 2.505973  | 5.167952  |

|   |            |           |           |
|---|------------|-----------|-----------|
| H | -7.356246  | 2.729598  | 5.086929  |
| H | -8.119489  | 1.295970  | 4.294294  |
| H | -3.059235  | -2.152195 | 3.652023  |
| H | -4.581242  | -1.110458 | -2.353149 |
| H | 0.067219   | -1.978315 | 0.792613  |
| H | 0.252586   | -3.167176 | -1.341935 |
| H | 0.925110   | -1.522959 | -1.608161 |
| H | -0.754664  | -1.903855 | -2.097404 |
| H | -10.897226 | -0.354309 | 0.174500  |
| H | -11.992238 | 4.091216  | 3.248890  |
| H | -6.558906  | -0.427140 | -0.274309 |
| H | -6.830521  | -0.743082 | -2.013397 |
| H | -9.964472  | 5.767807  | 2.743975  |
| H | -11.516013 | 6.387865  | 3.411425  |
| H | -11.192567 | 6.466841  | 1.658346  |
| H | -10.341189 | 0.644424  | 3.297977  |
| H | -6.057114  | -0.837419 | 4.167011  |
| H | -8.152647  | -4.376688 | 0.286563  |
| H | -11.088435 | -3.870027 | 0.360753  |
| H | -10.184402 | -4.968617 | -0.726472 |
| H | -10.123431 | -3.201697 | -0.981460 |
| H | -5.434821  | -3.253237 | 2.526585  |
| H | -4.969617  | -3.127873 | 4.250887  |
| H | -12.132789 | -1.286382 | 1.946879  |
| H | -12.556368 | 0.368479  | 2.515280  |
| H | -2.294392  | 7.796131  | -3.376542 |
| H | -1.368262  | 8.919379  | -2.338714 |
| H | -3.113030  | 8.636881  | -2.041000 |
| H | -0.825506  | 3.674164  | 3.394833  |
| H | 0.199538   | 2.992913  | 2.265052  |
| H | -0.586408  | 0.894475  | 2.510016  |
| H | -2.182428  | 1.486486  | 2.962341  |
| H | -1.212949  | 2.170013  | 5.233161  |
| H | 0.254327   | 1.260471  | 4.789401  |
| H | -2.788596  | 0.755814  | 6.593181  |
| H | -3.133584  | -0.834450 | 5.857157  |
| H | -3.743704  | 0.355752  | 3.710713  |
| H | -3.576898  | 1.915082  | 4.542077  |
| H | -5.386715  | 1.063084  | 6.034274  |
| H | -5.792121  | 1.274899  | 4.452370  |
| C | -1.023826  | -1.120987 | 4.624646  |
| O | 0.160441   | -1.021803 | 4.035461  |
| O | -1.664058  | -2.175178 | 4.809375  |
| H | 0.374428   | -1.860276 | 3.407788  |

|   |           |           |          |
|---|-----------|-----------|----------|
| H | 2.074043  | -1.153366 | 6.041735 |
| H | 5.349045  | 1.214318  | 4.916310 |
| H | 13.292890 | 1.827432  | 3.017133 |
| C | 2.501901  | -2.162829 | 6.098235 |
| H | 3.381965  | -2.134937 | 6.755392 |
| H | 8.210347  | 1.249272  | 3.841198 |
| H | 1.753859  | -2.845917 | 6.512656 |
| N | 5.756562  | 0.867032  | 4.053038 |
| H | 6.032786  | 2.848790  | 3.470361 |
| C | 12.591912 | 1.481081  | 2.248185 |
| H | 11.762295 | 0.945425  | 2.716397 |
| N | 7.740996  | 1.677415  | 3.049093 |
| N | 4.260478  | -0.839608 | 4.451158 |
| C | 6.289197  | 1.835836  | 3.123696 |
| N | 9.869964  | 2.130908  | 2.340604 |
| N | 11.994420 | 2.621837  | 1.546974 |
| C | 5.079954  | -0.246531 | 3.573479 |
| C | 8.536898  | 2.303673  | 2.146212 |
| N | 2.854563  | -2.655449 | 4.775197 |
| H | 5.654370  | -5.716035 | 4.449353 |
| N | 13.337154 | 0.587985  | 1.375575 |
| C | 10.628022 | 2.722866  | 1.403461 |
| H | 4.348442  | 4.471422  | 2.621667 |
| H | 14.317727 | 0.788589  | 1.199408 |
| H | 5.908320  | -4.028697 | 3.911755 |
| C | 5.351050  | -4.948622 | 3.723503 |
| C | 3.639525  | -1.944067 | 3.948164 |
| H | 4.277235  | -4.749064 | 3.815169 |
| H | 12.501361 | 2.981974  | 0.741151 |
| H | 5.865356  | 1.664846  | 2.130895 |
| N | 7.950487  | 3.010259  | 1.154026 |
| O | 3.436146  | 2.729858  | 2.153648 |
| C | 3.932993  | 4.041573  | 1.709114 |
| H | 2.244051  | -3.382547 | 4.333887 |
| N | 10.198627 | 3.446219  | 0.345096 |
| N | 5.324929  | -0.600070 | 2.298165 |
| H | 7.886040  | -1.349972 | 2.101294 |
| C | 12.741843 | -0.134227 | 0.367178 |
| C | 8.849458  | 3.540671  | 0.268019 |
| N | 11.404571 | -0.280226 | 0.419760 |
| H | 3.091112  | 4.624168  | 1.326982 |
| H | 5.883892  | 3.611592  | 0.943589 |
| N | 3.737188  | -2.372285 | 2.652838 |
| N | 7.004544  | -3.556511 | 1.845996 |

|   |           |           |           |
|---|-----------|-----------|-----------|
| N | 4.944803  | 3.967312  | 0.699671  |
| N | 5.670266  | -5.393292 | 2.369106  |
| N | 8.189936  | -1.700273 | 1.194940  |
| H | 9.030425  | 0.140896  | 0.801037  |
| C | 4.538526  | -1.626662 | 1.893712  |
| C | 2.855179  | 2.007271  | 1.146872  |
| N | 13.592222 | -0.618649 | -0.567186 |
| O | 1.383754  | -4.529453 | 3.432215  |
| C | 6.333708  | -4.652812 | 1.444703  |
| C | 7.577882  | -2.867418 | 0.836920  |
| C | 8.588393  | -0.675289 | 0.229725  |
| N | 8.325460  | 4.217850  | -0.778672 |
| N | 1.573924  | 2.257139  | 0.872992  |
| H | 5.114699  | -6.143932 | 1.970497  |
| H | 9.692399  | 5.692610  | -1.429038 |
| C | 10.900356 | -0.971518 | -0.628924 |
| N | 3.649406  | 1.123743  | 0.533413  |
| H | 3.057490  | -5.604017 | 1.739291  |
| C | 9.154036  | 4.815216  | -1.813703 |
| C | 4.607676  | 3.829666  | -0.625960 |
| H | 7.326325  | 4.035876  | -0.979849 |
| C | 1.146754  | -3.891934 | 2.368255  |
| N | 9.563339  | -1.136018 | -0.732234 |
| C | 12.953854 | -1.289620 | -1.555274 |
| N | 4.583130  | -1.952457 | 0.541703  |
| O | 0.755474  | -2.666343 | 2.263800  |
| H | 7.721610  | -0.308922 | -0.335474 |
| H | 5.499105  | -0.194563 | 0.016374  |
| H | 9.901437  | 4.108307  | -2.198642 |
| C | 2.154543  | -5.746236 | 1.122004  |
| N | 3.330829  | 4.055459  | -0.986732 |
| H | 1.606566  | -6.599097 | 1.543999  |
| C | 1.124017  | 1.595128  | -0.221459 |
| N | 6.274486  | -5.130004 | 0.165752  |
| N | 11.624169 | -1.481058 | -1.667832 |
| N | 7.636265  | -3.238150 | -0.472802 |
| N | 5.620154  | 3.497802  | -1.455233 |
| C | 4.947809  | -1.007987 | -0.454974 |
| C | 3.057989  | 0.488796  | -0.493452 |
| N | 1.314091  | -4.555557 | 1.138939  |
| H | 14.711313 | -1.504807 | -2.503427 |
| H | 3.965213  | -2.720945 | 0.270317  |
| N | 13.746792 | -1.819279 | -2.534175 |
| H | 0.852350  | 4.390017  | -0.936687 |

|   |           |           |           |
|---|-----------|-----------|-----------|
| O | -0.125688 | 1.914737  | -0.556727 |
| H | 8.492698  | 5.127968  | -2.629018 |
| C | 7.008435  | -4.409015 | -0.709401 |
| H | 10.179429 | 1.717893  | -2.324335 |
| H | 9.220553  | -1.734463 | -1.488610 |
| N | 1.819210  | 0.719328  | -0.963301 |
| O | 3.746409  | -0.453914 | -1.152168 |
| H | 1.585499  | -3.912987 | 0.393768  |
| C | 2.544459  | -6.029509 | -0.330735 |
| H | 4.244689  | -4.913651 | -0.505302 |
| H | 3.117910  | -6.973957 | -0.401129 |
| H | 5.490013  | -1.464603 | -1.282416 |
| C | 0.744368  | 4.640457  | -1.993107 |
| C | 3.086440  | 3.825899  | -2.296766 |
| C | 10.399018 | 1.429075  | -3.364965 |
| C | 5.238581  | 3.291174  | -2.738311 |
| N | 3.281808  | -4.873131 | -0.872597 |
| H | 0.746255  | 5.734242  | -2.109152 |
| H | 11.473115 | 1.553970  | -3.545038 |
| C | -0.690852 | 1.324111  | -1.759237 |
| H | 10.619946 | -0.670486 | -3.154980 |
| C | 13.206699 | -2.349919 | -3.778473 |
| N | 7.108950  | -4.959877 | -1.963330 |
| H | -1.053569 | 0.317976  | -1.538071 |
| H | 7.092007  | 2.602622  | -3.173625 |
| N | 10.040354 | 0.040425  | -3.624667 |
| N | 1.823927  | 4.014466  | -2.751358 |
| H | -0.211560 | 4.251085  | -2.352537 |
| N | 3.988408  | 3.392998  | -3.221167 |
| H | -1.532098 | 1.974708  | -2.009196 |
| N | 6.252556  | 2.983601  | -3.611902 |
| H | 12.319994 | -2.946559 | -3.546147 |
| H | 9.838356  | 2.077881  | -4.043414 |
| H | 1.627925  | -6.150204 | -0.926299 |
| H | 8.662790  | -3.832407 | -2.791384 |
| C | 8.752718  | -0.349243 | -3.820368 |
| H | 6.526540  | -5.778939 | -2.105374 |
| H | 13.964953 | -2.984832 | -4.250694 |
| N | 8.500842  | -1.664925 | -3.612542 |
| H | 4.662817  | -3.135590 | -2.218276 |
| C | 7.746358  | -4.335394 | -3.107405 |
| H | 12.909692 | -1.556307 | -4.484084 |
| H | 0.061548  | 1.304859  | -2.553069 |
| C | 3.347681  | -4.822397 | -2.336595 |

|   |          |           |           |
|---|----------|-----------|-----------|
| N | 7.847318 | 0.582144  | -4.216121 |
| C | 3.750560 | -3.409798 | -2.762553 |
| H | 2.966337 | -2.701514 | -2.457490 |
| C | 7.227987 | -2.036051 | -3.874213 |
| H | 1.721541 | 3.891137  | -3.753752 |
| C | 6.610870 | 0.074493  | -4.426961 |
| N | 6.904502 | -3.348657 | -3.764329 |
| H | 4.051891 | -5.557479 | -2.778117 |
| C | 5.956061 | 2.385709  | -4.907565 |
| H | 7.996277 | -5.142895 | -3.807847 |
| N | 6.222243 | -1.205827 | -4.272448 |
| H | 2.348933 | -5.062241 | -2.732716 |
| N | 5.652603 | 0.960398  | -4.862723 |
| H | 5.938519 | -3.610254 | -4.045299 |
| H | 6.837513 | 2.519867  | -5.538708 |
| H | 4.693683 | 0.686724  | -4.661666 |
| H | 5.092993 | 2.902612  | -5.328711 |
| N | 4.092226 | -3.353150 | -4.197816 |
| H | 4.373426 | -2.389576 | -4.430949 |
| H | 3.272794 | -3.586603 | -4.767069 |

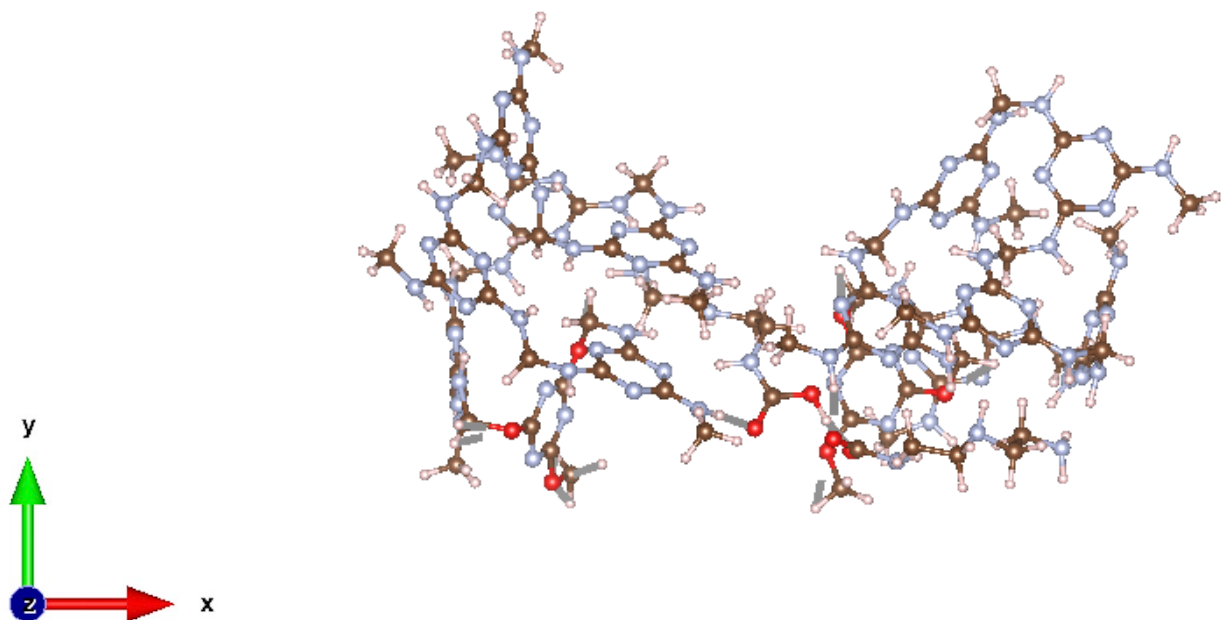

**Fig. S19. DFT-calculated structure of CO<sub>2</sub>-reacted mixed ammonium carbamate and carbamic acid within MNNS<sup>eya</sup> DETA (Structure 3).** The structure was obtained by DFT calculation at the TPSS-D3(BJ)/6-31G\* level.

Coordinates:

|   | X          | Y         | Z         |
|---|------------|-----------|-----------|
| C | -3.496614  | -2.869151 | 2.513130  |
| N | -3.524670  | -2.241746 | 1.294148  |
| C | -4.671516  | -1.605521 | 1.030285  |
| N | -5.746704  | -1.515024 | 1.841129  |
| C | -5.602429  | -2.202069 | 2.983004  |
| N | -4.526009  | -2.887010 | 3.405818  |
| N | -6.698079  | -2.213710 | 3.830228  |
| N | -4.753616  | -0.952452 | -0.185423 |
| N | -2.355831  | -3.506230 | 2.824281  |
| C | -8.001326  | -1.812513 | 3.356153  |
| C | -6.000704  | -0.597951 | -0.762957 |
| N | -8.308642  | -0.472262 | 3.872937  |
| C | -9.363773  | 0.301376  | 3.492598  |
| N | -9.550240  | 1.412216  | 4.251262  |
| C | -10.554453 | 2.195337  | 3.822447  |
| N | -11.347434 | 1.981873  | 2.748656  |
| C | -11.062152 | 0.842625  | 2.081171  |
| N | -10.091787 | -0.067752 | 2.413760  |
| N | -11.798264 | 0.568579  | 0.976359  |
| N | -10.839241 | 3.323577  | 4.556419  |
| C | -12.751015 | 1.538352  | 0.454326  |
| C | -9.778613  | 4.018544  | 5.294241  |
| N | -9.466717  | 5.324378  | 4.741525  |
| C | -8.937321  | 5.511731  | 3.488829  |
| N | -8.522911  | 4.412663  | 2.828706  |
| C | -8.019509  | 4.683664  | 1.602372  |
| N | -7.924966  | 5.920798  | 1.034376  |
| C | -8.362382  | 6.920460  | 1.826569  |
| N | -8.890992  | 6.796208  | 3.067471  |
| N | -7.617443  | 3.659907  | 0.816302  |
| N | -8.263022  | 8.194034  | 1.343064  |
| C | -7.906877  | 8.491376  | -0.036792 |
| C | -10.024090 | -3.901832 | 1.106003  |
| N | -10.337822 | -2.583419 | 0.643226  |
| O | -7.241023  | -5.919037 | -2.842045 |
| C | -7.304242  | -4.864230 | -2.006436 |
| N | -7.884184  | -5.138829 | -0.819713 |
| C | -7.945116  | -4.062103 | -0.028608 |
| N | -7.440419  | -2.845039 | -0.273817 |
| C | -6.884256  | -2.722657 | -1.491262 |
| N | -6.811282  | -3.690486 | -2.425476 |
| O | -6.364296  | -1.546463 | -1.861185 |



|   |            |           |           |
|---|------------|-----------|-----------|
| O | -8.586964  | -4.196340 | 1.171619  |
| C | -6.621997  | -5.661611 | -4.123758 |
| N | -3.353050  | 3.109787  | -1.162398 |
| C | -3.713920  | 2.465787  | 0.000451  |
| N | -5.021774  | 2.462448  | 0.333111  |
| C | -5.250691  | 1.866828  | 1.537909  |
| N | -4.329281  | 1.323720  | 2.352701  |
| C | -3.073973  | 1.335140  | 1.857433  |
| N | -2.693094  | 1.889104  | 0.669301  |
| N | -6.533786  | 1.835059  | 1.988285  |
| N | -2.096467  | 0.788379  | 2.620675  |
| C | -2.364187  | 0.045730  | 3.847068  |
| C | -10.375921 | -2.297986 | -0.697851 |
| N | -10.357584 | -3.327150 | -1.567478 |
| C | -10.340151 | -2.949189 | -2.862821 |
| N | -10.363444 | -1.675512 | -3.334152 |
| C | -10.469235 | -0.750470 | -2.361152 |
| N | -10.463947 | -0.990220 | -1.026811 |
| N | -10.640553 | 0.557342  | -2.731439 |
| N | -10.274766 | -3.929189 | -3.803942 |
| C | -7.668002  | 2.262932  | 1.188847  |
| C | -10.434665 | -5.347834 | -3.508819 |
| N | -8.911480  | 1.274845  | -4.316204 |
| C | -8.278674  | 2.256024  | -3.583134 |
| N | -9.079144  | 3.091121  | -2.881434 |
| C | -8.394640  | 4.036944  | -2.189984 |
| N | -7.044795  | 4.143044  | -2.111142 |
| C | -6.367968  | 3.251682  | -2.873441 |
| N | -6.934970  | 2.278384  | -3.644080 |
| N | -5.014451  | 3.321927  | -2.908998 |
| N | -9.101848  | 4.977018  | -1.506817 |
| C | -10.498686 | 4.771823  | -1.147981 |
| C | -4.219769  | 4.012929  | -1.905930 |
| C | -10.327480 | 1.015134  | -4.081414 |
| C | -2.153895  | -4.238039 | 4.064288  |
| N | -0.634321  | -1.921723 | 0.378289  |
| C | -0.087638  | -0.727443 | -0.238709 |
| C | -0.569005  | -0.503737 | -1.672288 |
| N | -2.027343  | -0.260884 | -1.738033 |
| C | -2.391200  | 0.174018  | -3.094292 |
| C | -3.907880  | 0.229098  | -3.255987 |
| N | -4.284767  | 1.026362  | -4.441499 |
| H | -6.632925  | -2.908583 | 4.567184  |
| H | -3.905100  | -0.991176 | -0.767860 |

|   |            |           |           |
|---|------------|-----------|-----------|
| H | -1.678831  | -3.697376 | 2.045221  |
| H | -7.992672  | -1.774043 | 2.264146  |
| H | -8.753730  | -2.538729 | 3.698386  |
| H | -5.963064  | 0.354634  | -1.288485 |
| H | -6.770649  | -0.623411 | 0.007770  |
| H | -7.889041  | -0.215896 | 4.762842  |
| H | -11.345879 | -0.055493 | 0.285846  |
| H | -11.517957 | 3.921792  | 4.089135  |
| H | -13.525490 | 1.748493  | 1.200537  |
| H | -13.210321 | 1.103713  | -0.440262 |
| H | -12.272857 | 2.494279  | 0.189230  |
| H | -10.078301 | 4.181550  | 6.336405  |
| H | -8.903056  | 3.363442  | 5.261250  |
| H | -9.872544  | 6.156315  | 5.157063  |
| H | -7.073395  | 3.891676  | -0.020949 |
| H | -8.750217  | 8.891118  | 1.896105  |
| H | -7.061106  | 7.861309  | -0.327665 |
| H | -7.616808  | 9.545824  | -0.104804 |
| H | -8.734551  | 8.300468  | -0.740011 |
| H | -10.498964 | -4.635050 | 0.450020  |
| H | -10.348454 | -4.011495 | 2.141820  |
| H | -10.163830 | -1.777163 | 1.269659  |
| H | -6.651600  | -6.624989 | -4.639624 |
| H | -5.591217  | -5.317413 | -3.989442 |
| H | -7.187081  | -4.899677 | -4.672604 |
| H | -2.350455  | 3.160166  | -1.311875 |
| H | -6.706352  | 1.245003  | 2.797450  |
| H | -1.180068  | 0.706426  | 2.189537  |
| H | -3.423383  | 0.168364  | 4.080887  |
| H | -1.752402  | 0.440537  | 4.669052  |
| H | -2.143211  | -1.017488 | 3.706256  |
| H | -10.456454 | 1.246995  | -2.004086 |
| H | -10.364147 | -3.598058 | -4.759247 |
| H | -7.728511  | 1.694505  | 0.251940  |
| H | -8.564633  | 2.089671  | 1.782480  |
| H | -10.105952 | -5.519352 | -2.481265 |
| H | -9.809495  | -5.935861 | -4.189045 |
| H | -11.484020 | -5.668051 | -3.610487 |
| H | -8.324228  | 0.470530  | -4.525833 |
| H | -4.540941  | 2.656256  | -3.553007 |
| H | -8.540203  | 5.510268  | -0.826127 |
| H | -11.030012 | 4.347347  | -2.003865 |
| H | -10.940302 | 5.739208  | -0.882692 |
| H | -10.600590 | 4.089780  | -0.287384 |

|   |            |           |           |
|---|------------|-----------|-----------|
| H | -4.914649  | 4.522112  | -1.232891 |
| H | -3.566351  | 4.750800  | -2.388427 |
| H | -10.871016 | 1.947629  | -4.246191 |
| H | -10.653632 | 0.245324  | -4.781757 |
| H | -2.364061  | -3.593535 | 4.927712  |
| H | -1.104608  | -4.552018 | 4.079577  |
| H | -2.805908  | -5.122465 | 4.132578  |
| H | 0.999720   | -0.820858 | -0.225238 |
| H | -0.350360  | 0.160711  | 0.361228  |
| H | -0.325748  | -1.383162 | -2.281580 |
| H | -0.006802  | 0.352632  | -2.095532 |
| H | -2.235517  | 0.507055  | -1.082778 |
| H | -1.961368  | -0.553021 | -3.800059 |
| H | -1.962046  | 1.164165  | -3.355338 |
| H | -4.321934  | 0.762787  | -2.391812 |
| H | -4.325058  | -0.789820 | -3.251382 |
| H | -3.896200  | 0.605898  | -5.291251 |
| H | -5.310373  | 1.029619  | -4.529936 |
| C | 0.079706   | -3.083903 | 0.574109  |
| O | 1.383356   | -2.983451 | 0.374475  |
| O | -0.497305  | -4.128914 | 0.954381  |
| H | -1.655124  | -2.026005 | 0.425958  |
| H | 1.878246   | -3.876916 | 0.795677  |
| H | 0.639008   | -0.226868 | 4.019840  |
| H | 1.851836   | 1.763660  | 0.563953  |
| H | 7.379749   | 7.721411  | -0.055802 |
| C | 0.625470   | -1.292221 | 3.760718  |
| H | 0.188680   | -1.861453 | 4.587885  |
| H | 4.192723   | 3.673008  | 0.225505  |
| H | 0.007968   | -1.434683 | 2.862008  |
| N | 2.845936   | 1.578655  | 0.465006  |
| H | 2.710277   | 2.228718  | -1.507426 |
| C | 7.698700   | 6.675440  | -0.141075 |
| H | 7.025097   | 6.038089  | 0.438637  |
| N | 4.414412   | 3.041833  | -0.539187 |
| N | 2.377637   | -0.026931 | 2.058754  |
| C | 3.485203   | 1.935595  | -0.784235 |
| N | 5.970803   | 4.646593  | -1.011149 |
| N | 7.596834   | 6.220528  | -1.529481 |
| C | 3.253829   | 0.450594  | 1.158611  |
| C | 5.362658   | 3.495946  | -1.401055 |
| N | 1.986910   | -1.766446 | 3.563888  |
| H | 4.502530   | 0.288740  | 6.281098  |
| N | 9.049907   | 6.611516  | 0.390348  |

|   |           |           |           |
|---|-----------|-----------|-----------|
| C | 6.950457  | 5.044416  | -1.838106 |
| H | 2.329689  | 1.113632  | -4.025757 |
| H | 9.639275  | 7.436533  | 0.336777  |
| H | 4.417918  | 0.429591  | 4.500961  |
| C | 4.527383  | -0.269802 | 5.332990  |
| C | 2.790690  | -1.180952 | 2.648381  |
| H | 3.703497  | -0.991665 | 5.302700  |
| H | 8.406841  | 6.386712  | -2.123229 |
| H | 4.043201  | 1.079753  | -1.173399 |
| N | 5.629451  | 2.788357  | -2.522418 |
| O | 2.396781  | -0.374231 | -2.674567 |
| C | 2.876597  | 0.172971  | -3.937771 |
| H | 2.128789  | -2.798863 | 3.654047  |
| N | 7.359239  | 4.431539  | -2.971382 |
| N | 4.464718  | -0.041717 | 0.847185  |
| H | 6.151798  | 1.763011  | 1.458576  |
| C | 9.752704  | 5.441564  | 0.549315  |
| C | 6.665404  | 3.305676  | -3.255216 |
| N | 9.067254  | 4.286237  | 0.451043  |
| H | 2.615610  | -0.520609 | -4.741410 |
| H | 4.668398  | 1.241402  | -3.464947 |
| N | 3.966887  | -1.821286 | 2.386000  |
| N | 6.475886  | 0.388287  | 3.393422  |
| N | 4.282337  | 0.438001  | -3.992096 |
| N | 5.806221  | -0.947716 | 5.169707  |
| N | 7.144986  | 1.542591  | 1.526199  |
| H | 7.454892  | 2.496283  | -0.276028 |
| C | 4.722450  | -1.217710 | 1.467115  |
| C | 2.898310  | -1.609559 | -2.345163 |
| N | 11.073344 | 5.603910  | 0.798451  |
| O | 2.110850  | -4.488033 | 3.421887  |
| C | 6.715508  | -0.657266 | 4.206459  |
| C | 7.413880  | 0.564334  | 2.439665  |
| C | 7.899648  | 1.672626  | 0.280829  |
| N | 7.017079  | 2.615961  | -4.366934 |
| N | 2.136594  | -2.661109 | -2.632386 |
| H | 5.997844  | -1.791178 | 5.699477  |
| H | 8.012141  | 4.022834  | -5.574655 |
| C | 9.845265  | 3.189993  | 0.606061  |
| N | 4.089026  | -1.602875 | -1.728483 |
| H | 4.550903  | -3.654109 | 4.270283  |
| C | 8.161609  | 3.013874  | -5.172347 |
| C | 5.181712  | -0.540569 | -4.317716 |
| H | 6.766284  | 1.609141  | -4.363225 |

|   |           |           |           |
|---|-----------|-----------|-----------|
| C | 2.921823  | -4.824459 | 2.511365  |
| N | 9.300622  | 1.959151  | 0.489192  |
| C | 11.728991 | 4.426430  | 0.925533  |
| N | 5.908362  | -1.858301 | 1.120902  |
| O | 2.707570  | -4.871500 | 1.237545  |
| H | 7.847180  | 0.749023  | -0.311129 |
| H | 6.049578  | -0.887596 | -0.699424 |
| H | 9.099724  | 3.019307  | -4.596692 |
| C | 4.733932  | -4.736869 | 4.158348  |
| N | 4.715078  | -1.739633 | -4.716345 |
| H | 4.228650  | -5.251770 | 4.986214  |
| C | 2.692243  | -3.825113 | -2.218912 |
| N | 7.815677  | -1.465303 | 4.170140  |
| N | 11.194771 | 3.194021  | 0.816185  |
| N | 8.598964  | -0.096646 | 2.336054  |
| N | 6.484646  | -0.187657 | -4.239970 |
| C | 6.362460  | -1.824201 | -0.236037 |
| C | 4.566705  | -2.835809 | -1.490515 |
| N | 4.217272  | -5.230465 | 2.885485  |
| H | 13.450641 | 5.446578  | 1.113858  |
| H | 6.014861  | -2.762461 | 1.598582  |
| N | 13.065722 | 4.511422  | 1.195601  |
| H | 3.288755  | -3.580240 | -4.954260 |
| O | 1.905141  | -4.892598 | -2.363961 |
| H | 8.249436  | 2.299682  | -5.998538 |
| C | 8.736206  | -1.064572 | 3.264577  |
| H | 10.293894 | 2.714395  | -2.595391 |
| H | 9.892619  | 1.164971  | 0.748825  |
| N | 3.932546  | -3.992005 | -1.731598 |
| O | 5.811248  | -2.972182 | -0.989607 |
| H | 4.880146  | -5.065368 | 2.126553  |
| C | 6.238407  | -5.017342 | 4.194471  |
| H | 7.125527  | -3.337515 | 3.433553  |
| H | 6.661501  | -4.760594 | 5.184231  |
| H | 7.438575  | -1.989574 | -0.302513 |
| C | 3.934689  | -4.401379 | -5.272748 |
| C | 5.682674  | -2.651671 | -4.950342 |
| C | 11.297358 | 2.264540  | -2.673914 |
| C | 7.349737  | -1.176666 | -4.561022 |
| N | 6.902697  | -4.285173 | 3.096852  |
| H | 3.627100  | -4.743261 | -6.271421 |
| H | 12.037465 | 3.070482  | -2.745276 |
| C | 2.361066  | -6.110458 | -1.702687 |
| H | 11.713518 | 1.933745  | -0.618371 |

|   |           |           |           |
|---|-----------|-----------|-----------|
| C | 13.955390 | 3.359890  | 1.186023  |
| N | 9.936868  | -1.728327 | 3.330926  |
| H | 2.580048  | -5.900342 | -0.649227 |
| H | 8.910127  | -0.000958 | -4.024391 |
| N | 11.612598 | 1.438117  | -1.516762 |
| N | 5.305849  | -3.909400 | -5.295527 |
| H | 3.833926  | -5.229882 | -4.560420 |
| N | 7.027264  | -2.443112 | -4.876857 |
| H | 1.517504  | -6.796659 | -1.810554 |
| N | 8.675462  | -0.815581 | -4.591353 |
| H | 13.403956 | 2.498809  | 1.573870  |
| H | 11.343422 | 1.646757  | -3.574800 |
| H | 6.399906  | -6.092802 | 4.031946  |
| H | 11.160068 | -0.475864 | 2.187252  |
| C | 11.162364 | 0.162028  | -1.388330 |
| H | 9.952697  | -2.503013 | 3.986094  |
| H | 14.817245 | 3.566848  | 1.831494  |
| N | 11.202672 | -0.347371 | -0.132656 |
| H | 8.390373  | -3.275091 | 1.198382  |
| C | 11.053117 | -1.536653 | 2.424437  |
| H | 14.317081 | 3.109962  | 0.174465  |
| H | 3.251470  | -6.501302 | -2.210399 |
| C | 8.129282  | -4.896988 | 2.578734  |
| N | 10.738468 | -0.493041 | -2.499304 |
| C | 8.379521  | -4.372474 | 1.162768  |
| H | 7.537739  | -4.671905 | 0.517303  |
| C | 10.813745 | -1.638012 | -0.039461 |
| H | 6.074760  | -4.566662 | -5.374239 |
| C | 10.365410 | -1.771177 | -2.259570 |
| N | 10.905092 | -2.253607 | 1.166281  |
| H | 9.026477  | -4.711126 | 3.203694  |
| C | 9.720146  | -1.829928 | -4.621747 |
| H | 11.950615 | -1.886448 | 2.950779  |
| N | 10.363241 | -2.407761 | -1.072121 |
| H | 7.983102  | -5.987654 | 2.549313  |
| N | 9.958020  | -2.504454 | -3.349741 |
| H | 10.654791 | -3.261978 | 1.186329  |
| H | 10.646345 | -1.332579 | -4.918408 |
| H | 9.364175  | -3.300480 | -3.129701 |
| H | 9.435941  | -2.587371 | -5.353359 |
| N | 9.706145  | -4.785974 | 0.662718  |
| H | 9.838031  | -4.393120 | -0.279986 |
| H | 9.754499  | -5.807108 | 0.588899  |

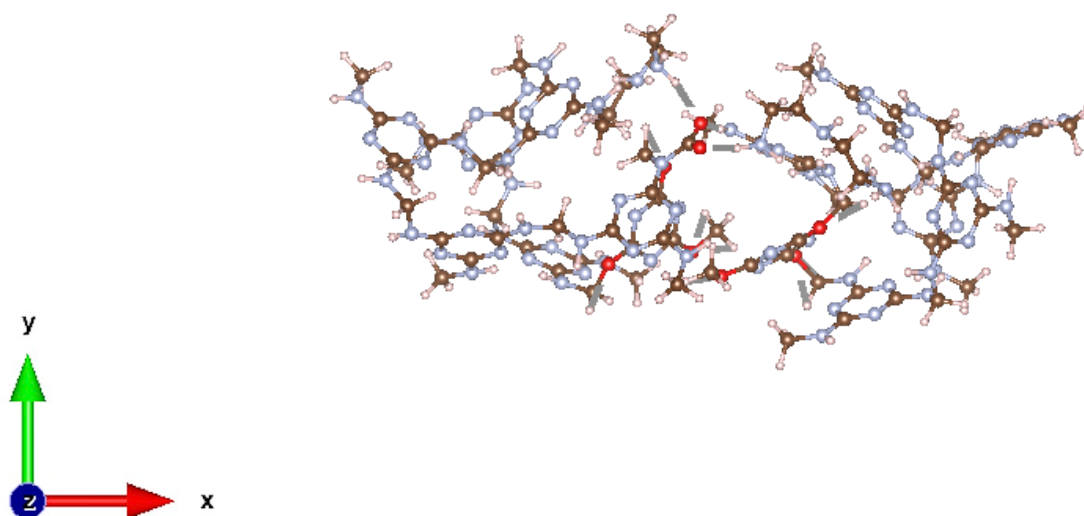

**Fig. S20. DFT-calculated structure of CO<sub>2</sub>-reacted ammonium carbamate pair within MNNs<sup>cy</sup><sub>a</sub> DETA (Structure 1).** The structure was obtained by DFT calculation at the TPSS-D3(BJ)/6-31G\* level.

Coordinates:

|   | X         | Y         | Z         |
|---|-----------|-----------|-----------|
| C | 1.904439  | 1.739572  | -0.749865 |
| N | 2.645498  | 1.462409  | 0.379736  |
| C | 3.864833  | 0.953674  | 0.130437  |
| N | 4.394219  | 0.697847  | -1.075793 |
| C | 3.534728  | 0.913545  | -2.089559 |
| N | 2.304245  | 1.452144  | -2.014986 |
| N | 3.960924  | 0.538587  | -3.341211 |
| N | 4.678737  | 0.639303  | 1.220783  |
| N | 0.700448  | 2.304144  | -0.581828 |
| C | 5.040483  | -0.414377 | -3.498603 |
| C | 5.296147  | -0.653186 | 1.240080  |
| N | 6.297319  | 0.289408  | -3.777359 |
| C | 7.479034  | -0.397607 | -3.930385 |
| N | 8.461085  | 0.293712  | -4.548420 |
| C | 9.632309  | -0.370969 | -4.605355 |
| N | 9.888772  | -1.602786 | -4.111105 |
| C | 8.823929  | -2.184001 | -3.517098 |
| N | 7.563104  | -1.646430 | -3.423897 |
| N | 8.999010  | -3.399168 | -2.951927 |
| N | 10.676393 | 0.245790  | -5.246356 |
| C | 10.300039 | -4.052266 | -2.927021 |
| C | 10.781790 | 1.708372  | -5.278885 |

|   |           |           |           |
|---|-----------|-----------|-----------|
| N | 11.866384 | 2.211085  | -4.456754 |
| C | 11.908090 | 2.093896  | -3.090602 |
| N | 10.789332 | 1.655514  | -2.473944 |
| C | 10.924449 | 1.574543  | -1.131386 |
| N | 12.052522 | 1.858935  | -0.420034 |
| C | 13.077809 | 2.308264  | -1.175263 |
| N | 13.080632 | 2.450447  | -2.521714 |
| N | 9.892205  | 1.122551  | -0.381285 |
| N | 14.225923 | 2.657706  | -0.531616 |
| C | 14.445507 | 2.462405  | 0.893766  |
| C | 4.251532  | -3.857692 | -3.036733 |
| N | 5.562249  | -3.752739 | -2.489454 |
| O | 0.319966  | -3.627268 | 0.647690  |
| C | 1.527588  | -3.166278 | 0.314391  |
| N | 1.799335  | -3.260172 | -1.006516 |
| C | 2.986195  | -2.748247 | -1.327328 |
| N | 3.863102  | -2.153645 | -0.501667 |
| C | 3.486432  | -2.175773 | 0.786619  |
| N | 2.336350  | -2.677669 | 1.273326  |
| O | 4.317314  | -1.663716 | 1.718811  |
| O | 3.319145  | -2.782383 | -2.650859 |
| C | -0.080151 | -3.466981 | 2.035367  |
| N | 8.078686  | 3.106880  | 3.391265  |
| C | 7.382253  | 3.040704  | 2.213315  |
| N | 7.858637  | 2.250306  | 1.235735  |
| C | 7.164494  | 2.362783  | 0.068157  |
| N | 6.102926  | 3.176801  | -0.153231 |
| C | 5.664522  | 3.803273  | 0.946505  |
| N | 6.245848  | 3.783474  | 2.179570  |
| N | 7.588782  | 1.631958  | -0.988771 |
| N | 4.497775  | 4.515781  | 0.858552  |
| C | 3.804390  | 4.744153  | -0.406188 |
| C | 5.874612  | -4.255158 | -1.252089 |
| N | 4.933236  | -4.946044 | -0.582471 |
| C | 5.326161  | -5.351495 | 0.645387  |
| N | 6.549486  | -5.155082 | 1.208090  |
| C | 7.414965  | -4.520765 | 0.396817  |
| N | 7.136959  | -4.020993 | -0.832979 |
| N | 8.711660  | -4.379524 | 0.812669  |
| N | 4.431564  | -6.023986 | 1.414277  |
| C | 8.639152  | 0.619684  | -0.884229 |
| C | 3.018795  | -6.189037 | 1.099364  |
| N | 8.812642  | -3.476454 | 3.091978  |
| C | 9.379519  | -2.246648 | 2.865192  |



|   |           |           |           |
|---|-----------|-----------|-----------|
| N | 10.343032 | -2.197341 | 1.918807  |
| C | 10.876798 | -0.959392 | 1.753196  |
| N | 10.482184 | 0.165394  | 2.403102  |
| C | 9.520578  | -0.029766 | 3.328808  |
| N | 8.915227  | -1.219644 | 3.609034  |
| N | 9.122921  | 1.035490  | 4.076581  |
| N | 11.894449 | -0.800092 | 0.873012  |
| C | 12.220019 | -1.784905 | -0.147816 |
| C | 9.329675  | 2.415689  | 3.675650  |
| C | 9.102342  | -4.594141 | 2.198904  |
| C | -0.209742 | 2.507471  | -1.706963 |
| N | 1.945284  | 1.694327  | 3.112498  |
| C | 2.378646  | 3.114690  | 3.294135  |
| C | 3.412293  | 3.140922  | 4.424836  |
| N | 4.462238  | 2.174246  | 4.061604  |
| C | 5.264558  | 1.627777  | 5.165850  |
| C | 5.956635  | 0.353634  | 4.670610  |
| N | 6.985521  | -0.098563 | 5.619812  |
| H | 3.229878  | 0.564921  | -4.045219 |
| H | 4.331989  | 0.957702  | 2.130405  |
| H | 0.288499  | 2.336244  | 0.366070  |
| H | 5.162893  | -0.987534 | -2.577860 |
| H | 4.780661  | -1.097096 | -4.320674 |
| H | 6.093619  | -0.698025 | 1.980353  |
| H | 5.632554  | -0.919468 | 0.238532  |
| H | 6.224977  | 1.105445  | -4.382612 |
| H | 8.306589  | -3.667577 | -2.229905 |
| H | 11.551656 | -0.263993 | -5.141484 |
| H | 10.648348 | -4.250301 | -3.947554 |
| H | 10.184818 | -5.000310 | -2.390986 |
| H | 11.061835 | -3.439207 | -2.424032 |
| H | 10.971100 | 2.054030  | -6.301365 |
| H | 9.819622  | 2.093927  | -4.929960 |
| H | 12.755153 | 2.445055  | -4.887515 |
| H | 9.984409  | 1.206456  | 0.635222  |
| H | 15.006607 | 2.878983  | -1.140175 |
| H | 13.498693 | 2.625798  | 1.416448  |
| H | 15.188621 | 3.188331  | 1.242601  |
| H | 14.800286 | 1.445865  | 1.129949  |
| H | 3.807283  | -4.810202 | -2.739401 |
| H | 4.299502  | -3.753282 | -4.121728 |
| H | 6.205534  | -3.026845 | -2.853904 |
| H | -1.108289 | -3.831509 | 2.064123  |
| H | -0.033145 | -2.413942 | 2.326235  |

|   |            |           |           |
|---|------------|-----------|-----------|
| H | 0.566497   | -4.063388 | 2.687289  |
| H | 7.690703   | 3.740798  | 4.081468  |
| H | 6.942513   | 1.558308  | -1.775078 |
| H | 4.357510   | 5.179686  | 1.614315  |
| H | 3.988623   | 3.880289  | -1.048413 |
| H | 4.167703   | 5.647528  | -0.919519 |
| H | 2.728711   | 4.834368  | -0.216697 |
| H | 9.252231   | -3.662794 | 0.330644  |
| H | 4.761498   | -6.226835 | 2.352647  |
| H | 8.320172   | -0.190319 | -0.213166 |
| H | 8.803646   | 0.227442  | -1.886376 |
| H | 2.872799   | -5.920347 | 0.050858  |
| H | 2.396416   | -5.533333 | 1.724152  |
| H | 2.716308   | -7.232195 | 1.256554  |
| H | 7.908656   | -3.460829 | 3.555504  |
| H | 8.440679   | 0.834414  | 4.828769  |
| H | 12.122887  | 0.182831  | 0.660868  |
| H | 12.064199  | -2.786327 | 0.261877  |
| H | 13.271154  | -1.665796 | -0.434481 |
| H | 11.593145  | -1.658487 | -1.045721 |
| H | 9.973527   | 2.411714  | 2.792825  |
| H | 9.818579   | 2.975790  | 4.481907  |
| H | 10.180848  | -4.767380 | 2.210080  |
| H | 8.566954   | -5.468547 | 2.570728  |
| H | 0.241999   | 3.189879  | -2.438162 |
| H | -1.128589  | 2.932584  | -1.297315 |
| H | -0.439019  | 1.552226  | -2.194625 |
| H | 2.681374   | 1.098899  | 3.526238  |
| H | 0.978918   | 1.549978  | 3.573594  |
| H | 1.482323   | 3.706620  | 3.497540  |
| H | 2.833714   | 3.441123  | 2.350969  |
| H | 2.945098   | 2.817095  | 5.365943  |
| H | 3.792188   | 4.165765  | 4.571466  |
| H | 5.093016   | 2.651772  | 3.395257  |
| H | 4.589902   | 1.394446  | 6.003547  |
| H | 6.022945   | 2.335595  | 5.545218  |
| H | 6.482076   | 0.589913  | 3.734509  |
| H | 5.186179   | -0.402397 | 4.432615  |
| H | 6.561711   | -0.391596 | 6.504994  |
| H | 7.475198   | -0.907609 | 5.210881  |
| H | -14.953863 | 5.290527  | -0.958641 |
| H | -14.326246 | 3.919757  | -1.921535 |
| C | -14.219597 | 4.477971  | -0.977321 |
| H | -15.355019 | 3.535978  | 0.588188  |

|   |            |           |           |
|---|------------|-----------|-----------|
| H | -13.475511 | 0.859807  | -2.606851 |
| H | -12.373906 | 0.233416  | -3.871754 |
| N | -14.426808 | 3.638024  | 0.192710  |
| H | -13.209576 | 4.897936  | -0.941779 |
| C | -12.434790 | 0.621232  | -2.850778 |
| N | -11.649708 | 1.844248  | -2.746472 |
| H | -11.874826 | 2.452905  | -1.948516 |
| C | -13.506684 | 2.739914  | 0.643530  |
| H | -12.077530 | -0.158545 | -2.157058 |
| C | -10.357246 | 1.889401  | -3.168874 |
| H | -9.914467  | -0.970696 | -5.605102 |
| N | -9.931094  | 0.899564  | -3.991241 |
| N | -13.901847 | 1.946499  | 1.669416  |
| N | -12.300913 | 2.732450  | 0.035587  |
| N | -9.612893  | 2.935590  | -2.727099 |
| C | -8.857817  | -1.160422 | -5.413701 |
| C | -8.647818  | 1.050340  | -4.390825 |
| H | -8.402789  | -1.706724 | -6.241017 |
| N | -8.174115  | 0.117654  | -5.289159 |
| C | -12.936546 | 1.090353  | 2.070677  |
| C | -11.429886 | 1.824888  | 0.560634  |
| C | -8.339412  | 2.946684  | -3.190478 |
| H | -11.548735 | -2.723309 | -1.802708 |
| H | -14.232909 | 0.324590  | 3.427518  |
| N | -7.786632  | 2.013677  | -4.019180 |
| N | -8.775529  | -1.995422 | -4.211582 |
| H | -9.391550  | -1.711464 | -3.451596 |
| H | -9.958593  | 2.502652  | -0.697234 |
| N | -13.272867 | 0.256759  | 3.107335  |
| N | -10.220642 | 1.764823  | -0.036768 |
| H | -8.803764  | 4.648841  | -1.368648 |
| C | -10.993108 | -3.665175 | -1.670749 |
| N | -11.688680 | 0.968103  | 1.576153  |
| H | -10.703540 | -4.058350 | -2.651205 |
| H | -7.876602  | 5.940130  | -2.185903 |
| H | -7.158376  | 0.074254  | -5.346181 |
| H | -11.660513 | -4.378234 | -1.173187 |
| N | -7.522742  | 3.972382  | -2.842833 |
| C | -7.829160  | 4.920267  | -1.782176 |
| H | -12.990274 | -2.041299 | 2.035570  |
| C | -7.550166  | -2.462277 | -3.806592 |
| H | -6.535620  | 3.885846  | -3.160846 |
| N | -12.219446 | -1.889188 | 2.683446  |
| C | -12.400369 | -0.778283 | 3.627123  |

|   |            |           |           |
|---|------------|-----------|-----------|
| C | -9.222403  | 0.759657  | 0.249639  |
| N | -11.036321 | -2.694495 | 0.874541  |
| N | -6.548639  | -2.440839 | -4.706010 |
| N | -9.775266  | -3.478123 | -0.892696 |
| H | -9.728296  | -0.167486 | 0.517334  |
| H | -8.646190  | 0.620367  | -0.672518 |
| N | -6.823637  | 4.938870  | -0.734061 |
| H | -12.852911 | -1.137884 | 4.558639  |
| C | -10.999431 | -2.126895 | 2.099572  |
| C | -9.815396  | -2.935854 | 0.346739  |
| H | -8.895183  | -3.351373 | -1.421708 |
| N | -7.585950  | 2.966128  | 0.218950  |
| N | -7.470123  | -2.922292 | -2.533990 |
| H | -5.451103  | 2.192431  | -3.602962 |
| H | -11.400879 | -0.382313 | 3.830922  |
| H | -6.120175  | 5.668615  | -0.722619 |
| N | -4.869734  | 3.017375  | -3.409788 |
| N | -8.323469  | 1.090877  | 1.340870  |
| C | -6.692913  | 3.975857  | 0.232921  |
| H | -4.608690  | -2.749164 | -6.073546 |
| C | -5.400479  | -3.011889 | -4.251424 |
| H | -4.163379  | 3.062718  | -4.150531 |
| C | -7.447490  | 2.128878  | 1.280647  |
| N | -9.896212  | -1.789119 | 2.794380  |
| N | -4.371090  | -3.052027 | -5.134159 |
| N | -8.607728  | -2.667023 | 0.941207  |
| C | -6.254925  | -3.410195 | -2.200741 |
| H | -8.303561  | 0.503412  | 2.166983  |
| C | -8.739064  | -2.077768 | 2.148630  |
| H | -4.141633  | 5.080232  | -2.086361 |
| C | -4.219722  | 2.921047  | -2.086043 |
| H | -5.018911  | 2.770990  | -1.349990 |
| N | -5.190952  | -3.510179 | -3.013901 |
| N | -5.680057  | 4.152686  | 1.104791  |
| N | -6.535577  | 2.212990  | 2.272800  |
| C | -3.485987  | 4.235177  | -1.787131 |
| H | -6.881999  | -3.602535 | -0.268352 |
| N | -6.133071  | -3.884278 | -0.915880 |
| C | -3.100016  | -3.720632 | -4.884433 |
| C | -5.646407  | 3.226046  | 2.112439  |
| H | -3.516376  | 2.078340  | -1.985313 |
| H | -3.069124  | -4.711443 | -5.363249 |
| N | -7.619735  | -1.688154 | 2.837890  |
| H | -2.586286  | 4.304910  | -2.420243 |

|   |           |           |           |
|---|-----------|-----------|-----------|
| H | -3.924746 | 4.345476  | 0.200904  |
| H | -2.277992 | -3.108367 | -5.273122 |
| N | -3.071780 | 4.306938  | -0.383021 |
| H | -7.814287 | -1.232531 | 3.726267  |
| H | -2.980847 | -3.835577 | -3.805131 |
| C | -4.863117 | -4.266803 | -0.375015 |
| C | -6.273756 | -1.601918 | 2.305121  |
| H | -2.509724 | 6.346119  | -0.760258 |
| H | -5.948962 | -0.562660 | 2.187343  |
| H | -6.268999 | -2.092614 | 1.329074  |
| N | -4.642220 | 3.354704  | 3.001912  |
| H | -4.211303 | -4.621326 | -1.174171 |
| C | -2.249475 | 5.491419  | -0.101848 |
| H | -3.410676 | 6.412276  | 1.467456  |
| O | -4.234274 | -3.137224 | 0.312576  |
| H | -5.006107 | -5.008752 | 0.413002  |
| H | -3.859242 | 3.995506  | 2.748069  |
| H | -3.748333 | 0.866739  | 1.152565  |
| C | -3.271465 | -2.422580 | -0.314064 |
| N | -3.158766 | -1.180081 | 0.182133  |
| C | -2.405804 | 5.980680  | 1.342918  |
| C | -4.485610 | 2.472688  | 4.151381  |
| H | -4.699131 | 1.436230  | 3.872632  |
| H | -2.736084 | 2.375710  | 1.005146  |
| C | -2.187761 | -0.459988 | -0.389949 |
| H | -5.158843 | 2.769580  | 4.970178  |
| N | -2.531528 | -2.979107 | -1.277323 |
| C | -2.750281 | 1.300528  | 1.166588  |
| O | -1.976033 | 0.798341  | 0.012263  |
| N | -5.346334 | -2.231227 | 3.237557  |
| H | -1.192346 | 5.248818  | -0.303430 |
| C | -1.607190 | -2.127635 | -1.775555 |
| N | -1.378868 | -0.862513 | -1.391837 |
| N | -2.260162 | 4.888688  | 2.327884  |
| H | -0.318188 | -1.077576 | -4.021833 |
| H | -1.675991 | 6.795926  | 1.496972  |
| N | -3.772793 | -0.550913 | 2.967470  |
| O | -0.860838 | -2.647935 | -2.758025 |
| H | -5.499264 | -3.205207 | 3.484466  |
| C | -4.079061 | -1.774519 | 3.440923  |
| C | 0.153864  | -1.784912 | -3.328000 |
| H | -3.448045 | 2.542649  | 4.495443  |
| H | -1.528076 | 4.217554  | 2.048621  |
| H | -1.971077 | 5.275938  | 3.230605  |

|   |           |           |           |
|---|-----------|-----------|-----------|
| N | -2.091331 | 0.950172  | 2.399867  |
| H | 0.833766  | -2.462056 | -3.846631 |
| C | -2.472980 | -0.230198 | 3.065266  |
| O | -0.508222 | 2.566097  | 1.954191  |
| H | 0.676979  | -1.233199 | -2.545339 |
| N | -3.249723 | -2.587076 | 4.141797  |
| C | -0.971583 | 1.743101  | 2.811581  |
| N | -1.524094 | -0.953266 | 3.677996  |
| C | -2.005702 | -2.084845 | 4.254524  |
| O | -0.537515 | 1.577726  | 3.990264  |
| H | -2.174443 | -4.558794 | 5.271916  |
| N | -1.080068 | -2.818410 | 4.950065  |
| C | -1.453555 | -3.934923 | 5.807757  |
| H | -0.233448 | -2.298113 | 5.160954  |
| H | -0.555950 | -4.521606 | 6.033884  |
| H | -1.917642 | -3.605020 | 6.751027  |
| H | 1.932357  | 1.480784  | 2.079784  |

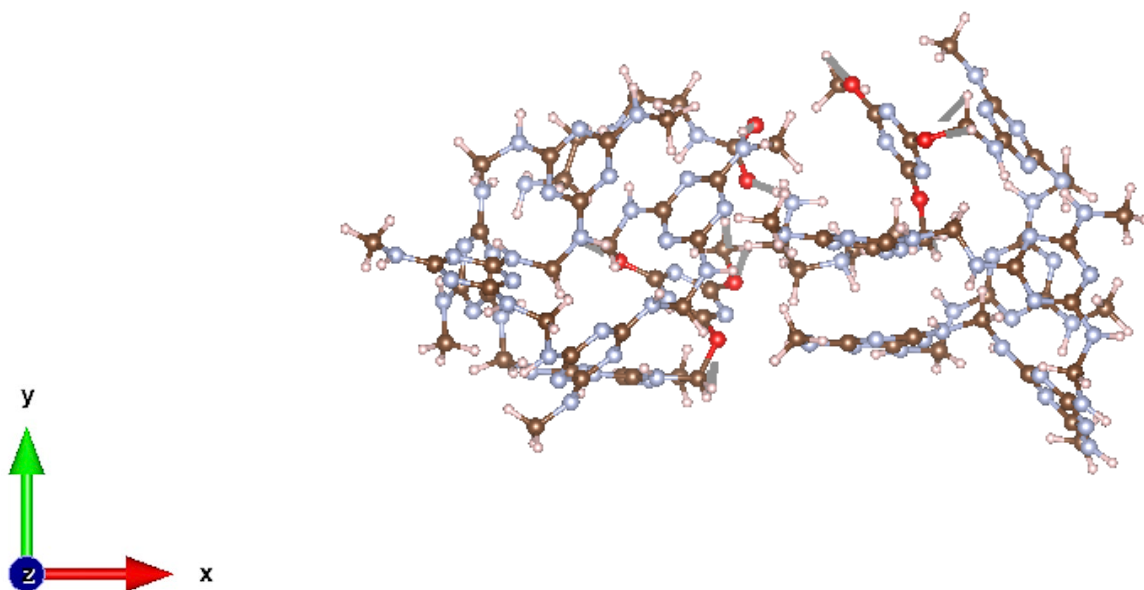

**Fig. S21. DFT-calculated structure of CO<sub>2</sub>-reacted ammonium carbamate pair within MNNs<sup>cyA</sup>  $\supset$  DETA (Structure 2).** The structure was obtained by DFT calculation at the TPSS-D3(BJ)/6-31G\* level.

## Coordinates:

|   | X         | Y         | Z         |
|---|-----------|-----------|-----------|
| C | 1.704832  | 0.638247  | 2.868782  |
| N | 2.066754  | 0.520283  | 1.560971  |
| C | 3.393406  | 0.344852  | 1.381539  |
| N | 4.328042  | 0.279968  | 2.354260  |
| C | 3.837425  | 0.519887  | 3.580580  |
| N | 2.541492  | 0.668064  | 3.925523  |
| N | 4.743148  | 0.641978  | 4.606499  |
| N | 3.838089  | 0.215241  | 0.085479  |
| N | 0.367930  | 0.783002  | 3.126879  |
| C | 6.126413  | 0.963299  | 4.316329  |
| C | 5.133288  | 0.663667  | -0.324653 |
| N | 6.926873  | -0.252937 | 4.354842  |
| C | 8.225312  | -0.309432 | 3.932911  |
| N | 8.874445  | -1.448237 | 4.274852  |
| C | 10.128427 | -1.515254 | 3.789751  |
| N | 10.756700 | -0.579547 | 3.042352  |
| C | 10.004186 | 0.517870  | 2.797213  |
| N | 8.716793  | 0.728091  | 3.224648  |
| N | 10.560059 | 1.511982  | 2.070371  |
| N | 10.867117 | -2.626800 | 4.107608  |
| C | 11.911008 | 1.422812  | 1.537777  |
| C | 10.230049 | -3.902195 | 4.450780  |
| N | 10.477901 | -4.946992 | 3.473215  |
| C | 10.024378 | -4.874743 | 2.177820  |
| N | 9.051941  | -3.978369 | 1.916638  |
| C | 8.697591  | -3.942610 | 0.611870  |
| N | 9.241032  | -4.697983 | -0.384562 |
| C | 10.165904 | -5.583734 | 0.044071  |
| N | 10.616065 | -5.727919 | 1.313471  |
| N | 7.769146  | -3.047563 | 0.203843  |
| N | 10.716373 | -6.411002 | -0.888756 |
| C | 10.493506 | -6.248882 | -2.319000 |
| C | 6.564871  | 4.440663  | 3.288238  |
| N | 7.546711  | 3.705392  | 2.561882  |
| O | 2.674238  | 5.858865  | -0.186634 |
| C | 3.485359  | 4.870179  | 0.210767  |
| N | 3.869484  | 4.959993  | 1.504584  |
| C | 4.688914  | 3.969186  | 1.872004  |
| N | 5.075430  | 2.925821  | 1.118542  |
| C | 4.626768  | 2.972604  | -0.141820 |
| N | 3.832064  | 3.917762  | -0.674957 |
| O | 4.980980  | 1.981648  | -0.981698 |

|   |           |           |           |
|---|-----------|-----------|-----------|
| O | 5.161159  | 3.987159  | 3.147248  |
| C | 2.248439  | 5.851464  | -1.583000 |
| N | 4.320937  | -3.109946 | -2.976022 |
| C | 4.074861  | -2.958291 | -1.635893 |
| N | 5.122260  | -2.774535 | -0.807654 |
| C | 4.752878  | -2.680991 | 0.499634  |
| N | 3.495080  | -2.769750 | 0.989063  |
| C | 2.546124  | -2.884697 | 0.038472  |
| N | 2.764102  | -2.977755 | -1.302847 |
| N | 5.740957  | -2.491807 | 1.418875  |
| N | 1.242729  | -2.915083 | 0.426460  |
| C | 0.805483  | -2.724279 | 1.799687  |
| C | 7.809735  | 3.970817  | 1.239260  |
| N | 7.206597  | 5.031716  | 0.669543  |
| C | 7.475635  | 5.164007  | -0.649152 |
| N | 8.288435  | 4.365114  | -1.393196 |
| C | 8.882972  | 3.394448  | -0.675574 |
| N | 8.678626  | 3.136148  | 0.639180  |
| N | 9.802045  | 2.590294  | -1.296331 |
| N | 6.865095  | 6.169455  | -1.324856 |
| C | 7.104292  | -2.093739 | 1.056349  |
| C | 5.986941  | 7.165015  | -0.726963 |
| N | 8.812685  | 1.889430  | -3.429278 |
| C | 8.575336  | 0.555070  | -3.189948 |
| N | 9.514368  | -0.113037 | -2.483803 |
| C | 9.227603  | -1.432758 | -2.324895 |
| N | 8.092259  | -2.055099 | -2.735714 |
| C | 7.252065  | -1.268848 | -3.439235 |
| N | 7.434636  | 0.055363  | -3.703882 |
| N | 6.122655  | -1.822145 | -3.957796 |
| N | 10.141030 | -2.227365 | -1.720101 |
| C | 11.271679 | -1.720281 | -0.956938 |
| C | 5.634599  | -3.142304 | -3.599572 |
| C | 9.910601  | 2.561740  | -2.750502 |
| C | -0.066363 | 1.209178  | 4.458306  |
| N | 0.658792  | 1.854657  | -1.568476 |
| C | 0.262286  | 0.438083  | -1.295110 |
| C | 0.863840  | -0.413471 | -2.412344 |
| N | 2.315836  | -0.124481 | -2.513656 |
| C | 2.733357  | 0.275495  | -3.874878 |
| C | 4.173102  | 0.800604  | -3.852345 |
| N | 4.855485  | 0.505076  | -5.127632 |
| H | 4.331841  | 0.999078  | 5.463417  |
| H | 3.128500  | 0.248810  | -0.661093 |



|   |           |           |           |
|---|-----------|-----------|-----------|
| H | -0.186007 | 1.190691  | 2.346915  |
| H | 6.196054  | 1.391377  | 3.313024  |
| H | 6.472476  | 1.699960  | 5.058744  |
| H | 5.548164  | 0.039870  | -1.116019 |
| H | 5.790837  | 0.741463  | 0.541583  |
| H | 6.670195  | -0.961951 | 5.036300  |
| H | 9.898003  | 2.184358  | 1.646281  |
| H | 11.757906 | -2.669006 | 3.617761  |
| H | 12.631741 | 1.282560  | 2.352082  |
| H | 12.125143 | 2.361521  | 1.016156  |
| H | 12.030105 | 0.584073  | 0.836455  |
| H | 10.606285 | -4.271825 | 5.411854  |
| H | 9.159266  | -3.697092 | 4.525999  |
| H | 11.295724 | -5.539044 | 3.586580  |
| H | 7.495609  | -3.059497 | -0.781789 |
| H | 11.511021 | -6.949183 | -0.560439 |
| H | 9.422468  | -6.119853 | -2.502097 |
| H | 10.846859 | -7.150223 | -2.830949 |
| H | 11.018710 | -5.370735 | -2.727775 |
| H | 6.597167  | 5.484874  | 2.969624  |
| H | 6.740067  | 4.334094  | 4.359161  |
| H | 7.855918  | 2.777071  | 2.885823  |
| H | 1.819519  | 6.845026  | -1.731642 |
| H | 1.483465  | 5.086732  | -1.758514 |
| H | 3.112915  | 5.689305  | -2.234003 |
| H | 3.492773  | -3.281517 | -3.537330 |
| H | 5.408292  | -2.175160 | 2.326435  |
| H | 0.547825  | -2.929609 | -0.316355 |
| H | 1.682581  | -2.818408 | 2.444709  |
| H | 0.066980  | -3.492072 | 2.069478  |
| H | 0.368838  | -1.727272 | 1.943309  |
| H | 9.945544  | 1.683732  | -0.851607 |
| H | 7.130143  | 6.245143  | -2.301433 |
| H | 7.100253  | -1.128150 | 0.534671  |
| H | 7.669859  | -2.012847 | 1.984613  |
| H | 5.629833  | 6.775943  | 0.229053  |
| H | 5.131103  | 7.347135  | -1.387440 |
| H | 6.513108  | 8.115642  | -0.552229 |
| H | 7.978234  | 2.441910  | -3.610414 |
| H | 5.547752  | -1.206266 | -4.561374 |
| H | 9.811326  | -3.180164 | -1.509034 |
| H | 11.687290 | -0.847886 | -1.469601 |
| H | 12.033754 | -2.505763 | -0.898759 |
| H | 10.983225 | -1.434085 | 0.067385  |

|   |           |           |           |
|---|-----------|-----------|-----------|
| H | 6.360972  | -3.584219 | -2.914376 |
| H | 5.545474  | -3.768376 | -4.496254 |
| H | 10.835951 | 2.034244  | -2.991461 |
| H | 9.948044  | 3.590512  | -3.111676 |
| H | 0.193068  | 0.446872  | 5.200141  |
| H | -1.154541 | 1.335080  | 4.421439  |
| H | 0.402823  | 2.156127  | 4.763358  |
| H | 1.683774  | 1.893813  | -1.673282 |
| H | 0.125549  | 2.221488  | -2.497729 |
| H | -0.831731 | 0.403331  | -1.294778 |
| H | 0.649527  | 0.159174  | -0.308732 |
| H | 0.371571  | -0.183083 | -3.363205 |
| H | 0.697251  | -1.475249 | -2.214394 |
| H | 2.795605  | -1.001893 | -2.286901 |
| H | 2.037569  | 1.050052  | -4.227050 |
| H | 2.669201  | -0.569234 | -4.585318 |
| H | 4.733022  | 0.256517  | -3.083953 |
| H | 4.188863  | 1.862011  | -3.558979 |
| H | 4.423472  | 1.021559  | -5.899876 |
| H | 5.832175  | 0.815595  | -5.037975 |
| H | -0.269573 | 3.833692  | 2.362856  |
| H | -1.356974 | -0.448814 | 2.553389  |
| H | -7.419258 | -2.425447 | 7.337514  |
| C | 0.105594  | 3.835969  | 1.331476  |
| H | 0.597640  | 4.790854  | 1.128316  |
| H | -3.843010 | -1.214227 | 3.882569  |
| H | 0.850475  | 3.028051  | 1.245021  |
| N | -2.251002 | -0.449340 | 2.061182  |
| H | -2.368458 | -2.515585 | 2.132359  |
| C | -7.673447 | -2.157409 | 6.305661  |
| H | -6.943200 | -1.441463 | 5.918590  |
| N | -4.098967 | -1.610121 | 2.980427  |
| N | -1.633531 | 1.660403  | 1.330348  |
| C | -3.036804 | -1.656342 | 1.973321  |
| N | -5.794459 | -2.480868 | 4.239701  |
| N | -7.594228 | -3.335360 | 5.433676  |
| C | -2.520295 | 0.636094  | 1.270083  |
| C | -5.123095 | -2.518214 | 3.064688  |
| N | -1.001489 | 3.689830  | 0.389595  |
| H | -3.893216 | 5.175658  | 3.373636  |
| N | -8.998691 | -1.566984 | 6.337285  |
| C | -6.854304 | -3.311553 | 4.279467  |
| H | -2.068065 | -4.419708 | 0.190163  |
| H | -9.646849 | -1.841068 | 7.069221  |

|   |            |           |           |
|---|------------|-----------|-----------|
| H | -3.448971  | 3.624797  | 2.613703  |
| C | -3.589609  | 4.692694  | 2.431192  |
| C | -1.872504  | 2.647079  | 0.428742  |
| H | -2.648716  | 5.130663  | 2.082114  |
| H | -8.442267  | -3.891070 | 5.343416  |
| H | -3.491383  | -1.718530 | 0.981967  |
| N | -5.388733  | -3.307440 | 2.003031  |
| O | -1.875725  | -2.771643 | -0.974548 |
| C | -2.531951  | -4.088620 | -0.739615 |
| H | -1.021182  | 4.255842  | -0.481018 |
| N | -7.262534  | -4.146626 | 3.298673  |
| N | -3.606636  | 0.573447  | 0.496185  |
| H | -5.671224  | 0.433271  | 2.522193  |
| C | -9.599974  | -1.009990 | 5.235026  |
| C | -6.498196  | -4.099247 | 2.186020  |
| N | -8.819398  | -0.783309 | 4.157696  |
| H | -2.258996  | -4.726184 | -1.582763 |
| H | -4.370688  | -3.759890 | 0.294508  |
| N | -2.886955  | 2.660171  | -0.468626 |
| N | -5.544477  | 2.757814  | 1.795013  |
| N | -3.942570  | -4.064633 | -0.598869 |
| N | -4.603176  | 4.844008  | 1.398593  |
| N | -6.516923  | 0.683467  | 2.017428  |
| H | -7.204020  | -1.235458 | 2.310683  |
| C | -3.723291  | 1.610097  | -0.363296 |
| H | 0.369081   | 2.496569  | -0.820693 |
| C | -2.379551  | -2.026508 | -2.001404 |
| N | -10.918370 | -0.747220 | 5.370134  |
| O | -0.593123  | 4.478991  | -2.214887 |
| C | -5.594542  | 3.944867  | 1.160101  |
| C | -6.547959  | 1.916025  | 1.453164  |
| C | -7.466843  | -0.376605 | 1.694356  |
| N | -6.850335  | -4.890404 | 1.147360  |
| N | -1.611376  | -1.927028 | -3.089725 |
| H | -4.731587  | 5.746325  | 0.953223  |
| H | -7.974683  | -6.430829 | 2.033770  |
| C | -9.498094  | -0.257948 | 3.112826  |
| N | -3.549185  | -1.402236 | -1.780648 |
| H | -3.208886  | 4.971212  | -1.496351 |
| C | -8.041958  | -5.726192 | 1.197376  |
| C | -4.761540  | -4.036651 | -1.702293 |
| H | -6.520965  | -4.585562 | 0.214397  |
| C | -1.281439  | 3.729605  | -2.984724 |
| N | -8.844311  | -0.030890 | 1.950143  |

|   |            |           |           |
|---|------------|-----------|-----------|
| C | -11.466903 | -0.219421 | 4.249942  |
| N | -4.805371  | 1.599383  | -1.205869 |
| O | -0.869052  | 2.607969  | -3.486854 |
| H | -7.397031  | -0.648537 | 0.633501  |
| H | -5.357770  | -0.318285 | -0.681308 |
| H | -8.962604  | -5.137588 | 1.327082  |
| C | -3.190633  | 5.209226  | -2.572411 |
| N | -4.189828  | -4.133007 | -2.917389 |
| H | -2.602880  | 6.124895  | -2.710666 |
| C | -2.126183  | -1.095107 | -4.020695 |
| N | -6.554114  | 4.350802  | 0.280450  |
| N | -10.829808 | 0.028816  | 3.085401  |
| N | -7.594417  | 2.195708  | 0.628260  |
| N | -6.081317  | -3.933153 | -1.449782 |
| C | -5.567335  | 0.416979  | -1.458315 |
| C | -3.990996  | -0.707718 | -2.842574 |
| N | -2.561453  | 4.135662  | -3.339164 |
| H | -13.267754 | -0.236674 | 5.147396  |
| H | -4.872218  | 2.388794  | -1.865975 |
| N | -12.792178 | 0.088216  | 4.312529  |
| H | -2.593391  | -4.072020 | -4.620495 |
| O | -1.306322  | -0.846643 | -5.052583 |
| H | -8.097135  | -6.280963 | 0.254785  |
| C | -7.550827  | 3.447998  | 0.131687  |
| H | -10.114235 | -3.148668 | 1.337206  |
| H | -9.343560  | 0.481603  | 1.215633  |
| N | -3.332986  | -0.511210 | -3.997233 |
| O | -5.202824  | -0.124062 | -2.783014 |
| H | -3.187075  | 3.359280  | -3.549908 |
| C | -4.615694  | 5.413177  | -3.083805 |
| H | -5.767675  | 4.306939  | -1.813115 |
| H | -5.046782  | 6.334856  | -2.652292 |
| H | -6.630321  | 0.629746  | -1.561583 |
| C | -3.163507  | -4.033757 | -5.551235 |
| C | -5.067402  | -4.020194 | -3.940735 |
| C | -11.098221 | -2.887537 | 0.914050  |
| C | -6.855797  | -3.876809 | -2.562622 |
| N | -5.441060  | 4.221335  | -2.787426 |
| H | -2.907843  | -4.900670 | -6.175551 |
| H | -11.870201 | -3.108528 | 1.659243  |
| C | -1.663262  | 0.300069  | -5.882766 |
| H | -11.285460 | -0.812119 | 1.351405  |
| C | -13.564042 | 0.512883  | 3.153021  |
| N | -8.618317  | 3.882379  | -0.611309 |

|   |            |           |           |
|---|------------|-----------|-----------|
| H | -1.625190  | 1.207161  | -5.267390 |
| H | -8.491808  | -3.554270 | -1.411481 |
| N | -11.179519 | -1.475651 | 0.569491  |
| N | -4.578233  | -4.047516 | -5.205951 |
| H | -2.903422  | -3.112431 | -6.089886 |
| N | -6.413945  | -3.869957 | -3.833287 |
| H | -0.892775  | 0.314288  | -6.657246 |
| N | -8.206431  | -3.847382 | -2.345401 |
| H | -12.983048 | 1.249407  | 2.589465  |
| H | -11.271860 | -3.490681 | 0.018440  |
| H | -4.585371  | 5.539629  | -4.175046 |
| H | -10.106740 | 2.605068  | 0.152561  |
| C | -10.581907 | -0.959881 | -0.532985 |
| H | -8.563254  | 4.854093  | -0.897844 |
| H | -14.496713 | 0.969141  | 3.501349  |
| N | -10.454686 | 0.391955  | -0.557915 |
| H | -7.248992  | 2.323626  | -2.598047 |
| C | -9.879862  | 3.167797  | -0.756635 |
| H | -13.802628 | -0.324330 | 2.477400  |
| H | -2.658404  | 0.161941  | -6.315532 |
| C | -6.619677  | 4.075336  | -3.660628 |
| N | -10.167151 | -1.815169 | -1.502363 |
| C | -7.090904  | 2.620889  | -3.642591 |
| H | -6.296070  | 1.976862  | -4.053276 |
| C | -9.939155  | 0.880909  | -1.707625 |
| H | -5.276743  | -3.911014 | -5.929416 |
| C | -9.645579  | -1.192110 | -2.582966 |
| N | -9.858983  | 2.228267  | -1.864009 |
| H | -7.458676  | 4.738336  | -3.378579 |
| C | -9.130278  | -3.442922 | -3.399384 |
| H | -10.653488 | 3.927719  | -0.921971 |
| N | -9.508679  | 0.135713  | -2.765937 |
| H | -6.318526  | 4.352609  | -4.681923 |
| N | -9.210584  | -2.001807 | -3.606192 |
| H | -9.492520  | 2.556724  | -2.777819 |
| H | -10.123092 | -3.799926 | -3.118042 |
| H | -8.519568  | -1.575572 | -4.218440 |
| H | -8.802085  | -3.901691 | -4.332560 |
| N | -8.396995  | 2.475688  | -4.312087 |
| H | -8.674777  | 1.484208  | -4.277356 |
| H | -8.328303  | 2.750939  | -5.296792 |
